# Supplementary material for: Bootstrap aggregation for model selection in the model-free formalism
Source: Copernicus journal article supplement (doi:10.5194/mr-2-251-2021), 2021-05-05
Supplement: Supplementary file 1 [file mr-2-251-2021-supplement.zip]

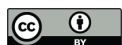

*Supplement of*

## **Bootstrap aggregation for model selection in the model-free formalism**

**Timothy Crawley and Arthur G. Palmer III**

*Correspondence to:* Arthur G. Palmer III (agp6@columbia.edu)

- [mr-2-251-2021-supplement-title-page.pdf](#)
- [Crawley\\_Bootstrap\\_Aggregation.ipynb](#)

The copyright of individual parts of the supplement might differ from the article licence.
