# Supplementary material for: Bootstrap aggregation for model selection in the model-free formalism
Source: Magn Reson (Gott). 2021 May 5;2(1):251–64. doi: 10.5194/mr-2-251-2021 (PMC8372780; doi:10.5194/mr-2-251-2021)
Supplement: The supplement related to this article is available online at: https://doi.org/10.5194/mr-2-251-2021-supplement. [file mr-2-251-supplement.zip › Crawley_Bootstrap_Aggregation.ipynb]

# %% [markdown]
# Bootstrap Aggregation for Model-Free Selection

# %% [markdown]
### Timothy Crawley and Arthur G. Palmer 

This notebook performs the calculations described in:

T. Crawley and A.G. Palmer, Bootstrap Aggregation for Model Selection in the Model-free Formalism", Magnetic Reson., submitted (2021).

This notebook uses <sup>15</sup>N relaxation data for the bZip domain of GCN4. The data are
described in:

M. L. Gill, R. A. Byrd, and A. G. Palmer, Dynamics of GCN4 facilitate DNA interaction: A model-free analysis of an intrinsically disordered region, Phys. Chem. Chem. Phys. 18, 5839-5849 (2016). doi: 10.1039/C5CP06197K. PMCID: PMC4894059.

The data are available at Mendeley Data (http://dx.doi.org/10.17632/vpwz6mrynr.1).

# %% [code]
import matplotlib as mpl
from mpl_toolkits.mplot3d import Axes3D
import matplotlib.axes as ax
from matplotlib import pyplot as plt
import numpy as np
from multiprocessing import Pool
import re
import os
import seaborn as sns
import time as time
import warnings
# from random import choices
from scipy.optimize import curve_fit
from scipy.stats.mstats import winsorize
from IPython.display import display, HTML

warnings.filterwarnings("error")

%matplotlib inline

nCPU = os.cpu_count()
print(os.getcwd())


# %% [code]
# eye-friendly colors from https://jfly.uni-koeln.de/color/

ReddishPurple = [204/255.0,121/255.0,167/255.0]
Orange = [230/255.0,159/255.0,0/255.0]
Green = [0,158/255.0,115/255.0]
Blue = [0,114/255.0,178/255.0]

# %% [markdown]
## Fitting Functions

# %% [code]
"""
These two fitting functions were written instead of using built-in numpy routines just 
to make jackknife simulations transparent.
"""

def linlsqfit(x,y,dy,error=''):
    """Function to fit least squares line.
    Inputs: x=independent_variable, y=dependent_variable, dy=y_uncertainty
    Returns: fitted chisquare, slope, slope_error, intercept, intercept_error
    Error estimates use jackknife error estimation if error=jack"""

    ajack=np.zeros(len(x))
    bjack=np.zeros(len(x))
    
    sx=np.sum(x/dy**2)
    sy=np.sum(y/dy**2)
    se=np.sum(1/dy**2)
    
    sxoss=sx/se
    tmp=(x-sxoss)/dy
    st2=np.sum(tmp*tmp)
    a=np.sum(tmp*y/dy)
    
    a=a/st2
    b=(sy-sx*a)/se
    
    errb=np.sqrt((1+sx*sx/(se*st2))/se)
    erra=np.sqrt(1/st2)
    
    chi2=np.sum((y-a*x-b)**2/dy**2)  #/(len(x)-2)

    #do jackknife error estimation
    if error.lower() == 'jack':
        for i in range(0,len(x)):
            xj=np.roll(x,i+1)[0:len(x)-1]
            yj=np.roll(y,i+1)[0:len(y)-1]
            dyj=np.roll(dy,i+1)[0:len(dy)-1]
        
            sx=np.sum(xj/dyj**2)
            sy=np.sum(yj/dyj**2)
            se=np.sum(1/dyj**2)
    
            sxoss=sx/se
            tmp=(xj-sxoss)/dyj
            st2=np.sum(tmp*tmp)
            ajack[i]=np.sum(tmp*yj/dyj)
    
            ajack[i]=ajack[i]/st2
            bjack[i]=(sy-sx*ajack[i])/se
            
            ajack[i]=a*len(x)-(len(x)-1)*ajack[i]
            bjack[i]=b*len(x)-(len(x)-1)*bjack[i]
        
        erra=np.std(ajack)/np.sqrt(len(x)-1)
        errb=np.std(bjack)/np.sqrt(len(x)-1)
    
    return chi2,a,erra,b,errb

def linlsqfitnointercept(x,y,dy,error = ''):
    """Function to fit least squares line through origin. 
    The slope is equal to a weighted mean of the ratio y/x.
    Inputs: x=independent_variable, y=dependent_variable, dy=y_uncertainty
    Returns: fitted chisquare, slope, slope_error
    Error estimates use jackknife error estimation if error=jack"""
    
    ajack=np.zeros(len(x))
    
    sxy=np.sum(y*x/dy**2)
    sxx=np.sum(x**2/dy**2)
    
    a=sxy/sxx
    
    chi2=np.sum((y-a*x)**2/dy**2)  #/(len(x)-1)
    erra=np.sqrt(chi2/((len(x)-1)*sxx))
    
    #do jackknife error estimation
    if error.lower() == 'jack':
        for i in range(0,len(x)):
            xj=np.roll(x,i+1)[0:len(x)-1]
            yj=np.roll(y,i+1)[0:len(y)-1]
            dyj=np.roll(dy,i+1)[0:len(dy)-1]
        
            sxx=np.sum(xj*xj/dyj**2)
            sxy=np.sum(xj*yj/dyj**2)
    
            ajack[i]=a*len(x)-(len(x)-1)*sxy/sxx
    
        erra=np.std(ajack)/np.sqrt(len(x)-1)
    
    return chi2,a,erra

# %% [code]
#Model-free spectral density functions incorporating different motional models

def Jmf1(w,tm,s2):
    jw=(2.0/5.0)*(s2*tm/(1+w**2*tm**2))
    return jw
setattr(Jmf1, 'parameters', ['tm', 'S2'])
setattr(Jmf1, 'bounds', ([0,0], [25.0, 1.0]))

def Jmf2(w,tm,s2,te):
    """
    s2 and te are interpreted as sf2 and tf if te <= 200 ps and
    as ss2 and ts if te > 200ps
    """
    tep=tm*te/(tm+te)
    jw=(2.0/5.0)*(s2*tm/(1+w**2*tm**2)+(1-s2)*tep/(1+w**2*tep**2))
    return jw
setattr(Jmf2, 'parameters', ['tm', 'S2', 'te'])
setattr(Jmf2, 'bounds', ([0,0,0], [25.0, 1.0, 25.0/3]))

def Jmf3(w,tm,sf2,ss2,ts):
    tsp=tm*ts/(tm+ts)
    jw=(2.0/5.0)*sf2*(ss2*tm/(1+w**2*tm**2)+(1-ss2)*tsp/(1+w**2*tsp**2))
    return jw
setattr(Jmf3, 'parameters', ['tm', 'Sf2', 'Ss2', 'ts'])
setattr(Jmf3, 'bounds', ([0,0,0,0], [25.0, 1.0, 1.0, 25.0/3]))
                    
def Jmf4(w,tm,sf2,ss2,tf,ts):
    # Eq. 2, Skrynnikov et al., J. AM. CHEM. SOC. 2002, 124, 6449-6460
    t1=tm*(ts+tf)/(tm+ts+tf)
    t2=tm*tf/(tm+tf)
    t3 = tm*(ts+tf)*tf / (tm*(ts+tf) + tm*tf + (ts+tf)*tf)
    jw = (2.0/5.0)*(sf2*ss2*tm/(1+w**2*tm**2)+
                      sf2*(1-ss2)*t1/(1+w**2*t1**2)+
                     (1-sf2)*ss2*t2/(1+w**2*t2**2)+
                     (1-sf2)*(1-ss2)*t3/(1+w**2*t3**2))
    return jw
setattr(Jmf4, 'parameters', ['tm', 'Sf2', 'Ss2', 'tf', 'ts'])
setattr(Jmf4, 'bounds', ([0,0,0,1.0e-6,0], [25.0, 1.0, 1.0, 25.0/3, 25.0/3]))

models = ['Jmf1', 'Jmf2', 'Jmf3', 'Jmf4']
modelDictionary = {'Jmf1':Jmf1,'Jmf2':Jmf2,'Jmf3':Jmf3,'Jmf4':Jmf4}


# %% [code]
# Functions: Grid Search

def GenerateGrid(omega,model,TmGrid):
    '''
    Input: omega; model to fit; optimize tm or use fixed value
    Output: grid_p0 (Initial guess of parameter values for curve_fit).
    
    Parameter grid values generated with np.linspace are fed to np.meshgrid,
    which converts them into multidimensional arrays suitable for vectorized
    calculations. This allows for the calculation of Jw and chisq over the
    entire parameter space at once.
    ***The numuber of grid values is limited by the computers total memory and
    can be set by modifying the value of npoints.'''

    # Create parameter arrays to include in grid search.
    # grid_par = list of parameter arrays to vectorize
    # val_par = list of N-dimensional vectorized parameter arrays
    parameters = model.parameters
    npars = len(parameters)
    ubounds = model.bounds[1]
    
    
    # Grid for tm is input
    if type(TmGrid) is np.ndarray:
        gridtm = TmGrid
    else:
        gridtm = np.array([TmGrid])
    grid_par = list([gridtm])
    valtm = np.array([])
    val_par = list([valtm])
    
    # Other upper bounds are taken from model bounds
    for i,val in enumerate(parameters):
        if val == 'S2':
            gridS2 = np.linspace(0.01, 1.0, 25)
            grid_par.append(gridS2)
            valS2 = np.array([])
            val_par.append(valS2)
        elif val == 'Sf2':
            gridSf2 = np.linspace(0.1, 1.0, 25)
            grid_par.append(gridSf2)
            valSf2 = np.array([])
            val_par.append(valSf2)
        elif val == 'Ss2':
            gridSs2 = np.linspace(0.01, 1.0, 25)
            grid_par.append(gridSs2)
            valSs2 = np.array([])
            val_par.append(valSs2)
        elif val == 'te':
            gridTe = np.linspace(0.001, ubounds[i], 25)
            grid_par.append(gridTe)
            valTe = np.array([])
            val_par.append(valTe)
        elif val == 'tf':
            gridTf = np.linspace(0.001, ubounds[i], 25)
            grid_par.append(gridTf)
            valTf = np.array([])
            val_par.append(valTf)
        elif val == 'ts':
            gridTs = np.linspace(0.001, ubounds[i], 25)
            grid_par.append(gridTs)
            valTs = np.array([])
            val_par.append(valTs)

    valomega = np.array([])
    val_par.append(valomega)
    val_par = np.meshgrid(*grid_par, omega,
                          copy=False, sparse=True, indexing='ij')

    # Calculate jw for all gridpoints
    gridjw = (model(val_par[-1], *val_par[0:-1]))

    return grid_par,gridjw

def SearchGrid(omega, jomega, jomegaerr,model,grid_par,gridjw):
    # Find optimal parameters for each residue
    
    parameters = model.parameters
    npars = len(parameters)
    Nresidues = jomega.shape[0]
    
    grid_p0 = np.zeros([Nresidues, npars])
    for nres in range(Nresidues):
        jw = jomega[nres, :]
        jwerr = jomegaerr[nres, :]
        tempchi = np.sum(((jw-gridjw)**2)/(jwerr**2), axis=len(parameters))
        bestchi = np.min(tempchi)
        index = np.array(np.where(tempchi == bestchi)).flatten()
        for i in range(0, len(parameters)):
            grid_p0[nres, i] = (grid_par[i][index[i]])

    return grid_p0

def SearchGrid1(wpointer, jw, jwerr,model,grid_par,gridjw):
    # Find optimal parameters for a single residue
    
    parameters = model.parameters
    npars = len(parameters)
    grid_p0 = np.zeros(npars)
    
    tempchi = np.sum(((jw-gridjw[...,wpointer])**2)/(jwerr**2), axis=len(parameters))
    bestchi = np.min(tempchi)
    index = np.array(np.where(tempchi == bestchi)).flatten()
    for i in range(0, len(parameters)):
            grid_p0[i] = (grid_par[i][index[i]])

    return grid_p0


def GridSearch(omega, jomega, jomegaerr, model,TmGrid):
    '''
    Input: omega, jomega, jomegaerr; model to fit; optimize tm or use fixed
            value, npoints=grid density.
    Output: grid_p0 (Initial guess of parameter values for curve_fit).
    Parameter grid values generated with np.linspace are fed to np.meshgrid,
    which converts them into multidimensional arrays suitable for vectorized
    calculations. This allows for the calculation of Jw and chisq over the
    entire parameter space at once.
    ***The numuber of grid values is limited by the computers total memory and
    can be set by modifying the value of npoints.'''

    # Create parameter arrays to include in grid search.
    # grid_par = list of parameter arrays to vectorize
    # val_par = list of N-dimensional vectorized parameter arrays
    parameters = model.parameters
    npars = len(parameters)
    ubounds = model.bounds[1]
    
    Nresidues = jomega.shape[0]
    
    # Grid for tm is input
    if type(TmGrid) is np.ndarray:
        gridtm = TmGrid
    else:
        gridtm = np.array([TmGrid])
    grid_par = list([gridtm])
    valtm = np.array([])
    val_par = list([valtm])
    
    # Other upper bounds are taken from model bounds
    for i,val in enumerate(parameters):
        if val == 'S2':
            gridS2 = np.linspace(0.01, 1.0, 25)
            grid_par.append(gridS2)
            valS2 = np.array([])
            val_par.append(valS2)
        elif val == 'Sf2':
            gridSf2 = np.linspace(0.5, 1.0, 25)
            grid_par.append(gridSf2)
            valSf2 = np.array([])
            val_par.append(valSf2)
        elif val == 'Ss2':
            gridSs2 = np.linspace(0.01, 1.0, 25)
            grid_par.append(gridSs2)
            valSs2 = np.array([])
            val_par.append(valSs2)
        elif val == 'te':
            gridTe = np.linspace(0.001, ubounds[i], 25)
            grid_par.append(gridTe)
            valTe = np.array([])
            val_par.append(valTe)
        elif val == 'tf':
            gridTf = np.linspace(0.001, ubounds[i], 25)
            grid_par.append(gridTf)
            valTf = np.array([])
            val_par.append(valTf)
        elif val == 'ts':
            gridTs = np.linspace(0.01, ubounds[i], 25)
            grid_par.append(gridTs)
            valTs = np.array([])
            val_par.append(valTs)

    valomega = np.array([])
    val_par.append(valomega)
    val_par = np.meshgrid(*grid_par, omega,
                          copy=False, sparse=True, indexing='ij')

    # Calculate jw for all gridpoints
    gridjw = (model(val_par[-1], *val_par[0:-1]))

    # Find optimal parameters for each residue
    grid_p0 = np.zeros([Nresidues, len(parameters)])
    for nres in range(Nresidues):
        jw = jomega[nres, :]
        jwerr = jomegaerr[nres, :]
        tempchi = np.sum(((jw-gridjw)**2)/(jwerr**2), axis=len(parameters))
        bestchi = np.min(tempchi)
        index = np.array(np.where(tempchi == bestchi)).flatten()
        for i in range(0, len(parameters)):
            grid_p0[nres, i] = (grid_par[i][index[i]])

    return grid_p0


# %% [code]
# functions to fit model-free models to J(w)

def fitMF(model,fields,inpdata,inperror,inpp0,Nmonte,FixTm=False):
    """
    Fit L-S model to data for 1 residue
    Inputs: Larmor frequencies, J(w), error in J(w), 
            input parameters, number of simulations, input parameters.
    Outputs: chisquare, AICc, modelFit (Monte if Nmonte > 0).
    
    Monte = [npar, Nmonte], npar = len(parameters)-1 if tm fixed 
                    and npar = len(parameters) if tm optimized
    """
    
    eps = 1e-6  #minimum chisq
    ndat = len(inpdata)
    parameters = model.parameters
    npar = len(parameters)
    nfit = npar
    bounds = model.bounds
    
    if FixTm:
        bounds = [bounds[0][1:],bounds[1][1:]]
        parameters = parameters[1:]
        tm0 = inpp0[0]
        nfit = npar-1
        
    if Nmonte > 0:
        Monte = np.zeros([npar+2,Nmonte])

    # Fit Model
    if FixTm:
        modelFit,covar = curve_fit(lambda w,*parameters:model(w,tm0,*parameters),
                                   fields,inpdata,p0=inpp0[1:],sigma=inperror,bounds=bounds,
                                method='trf',jac='3-point',maxfev=100000)
        modelFit = np.append(tm0,modelFit) 
    else:
        modelFit,covar = curve_fit(model,fields,inpdata,p0=inpp0,sigma=inperror,bounds=bounds,
                                method='trf',jac='3-point',maxfev=100000)
    
    jfit=model(fields,*modelFit)
    chisq=np.sum((inpdata-jfit)**2/inperror**2)
    aic = ndat*np.log(chisq/ndat+eps)+2*ndat*(nfit+1)/(ndat-nfit-2)
    
    # Monte Carlo Simulations
    if Nmonte > 0:
        for k in range(0,Nmonte):
            tempdata = jfit + np.random.normal(0,inperror,size=len(jfit))
            if FixTm:
                tempfit,covar = curve_fit(lambda w,*parameters: model(w,modelFit[0],*parameters),fields,tempdata,
                        p0=modelFit[1:],sigma=inperror,bounds=bounds,method='trf',jac='3-point',maxfev=100000)
                tempfit = np.append(modelFit[0],tempfit)
            else:
                tempdata = jfit + np.random.normal(0,inperror,size=len(jfit))
                tempfit,covar = curve_fit(model,fields,tempdata,
                        p0=modelFit,sigma=inperror,bounds=bounds,method='trf',jac='3-point',maxfev=100000)
            Monte[0:-2,k] = tempfit
            jfitMonte=model(fields,*tempfit)
            Monte[-2,k]=np.sum((tempdata-jfitMonte)**2/inperror**2)
            Monte[-1,k]=ndat*np.log(Monte[-2,k]/ndat)+2*ndat*(nfit+1)/(ndat-nfit-2)           
    
        return chisq,aic,modelFit,Monte
    else:
        return chisq,aic,modelFit


# %% [markdown]
## Data Analysis for GCN4

# %% [code]
#calculate coupling constants

rnh = 1.02e-10       # 1H-15N effective bond length
gammah = 2.6752e8    # 1H gamma
gamman = -2.71e7     # 15N gamma
dsigma=-172e-6       # 15N chemical shift anisotropy
mu = 1e-7            # mu0/(4 pi)
hbar = 6.626e-34 / (2*np.pi)

#Larmor frequencies (1/ns)
fieldH=2*3.14159*np.array([600.13,700.13,800.13,900.13])*0.001
fieldN=-fieldH*gamman/gammah

B0=fieldH*1e9/gammah      #in Tesla

#dipole and CSA coupling constants
dd = (mu*hbar*gammah*gamman/rnh**3)**2
cc = (B0*gamman*dsigma)**2/3

#fields associated with reduced spectral density values
allfields=np.concatenate([np.array([0]),fieldN,0.87*fieldH])

allfieldsJ0ind=np.concatenate([np.array([0,0,0,0]),fieldN,0.87*fieldH])

# %% [code]
#read in 4 field relaxation data

"""
The data are stored in comma separated value format. 
The first line is commented with a '#'. Subsequent lines are:

residue_number,1H_field,R1,R1_error,R2,R2_error,NOE,NOE_error
"""

res=np.array([])
r1data=np.array([])
r2data=np.array([])
noedata=np.array([])

gammafile=open('./GCN4_4field_15Nrates.csv','r')

for line in gammafile:
    line0=line.strip()
    
    if len(line0) > 0 and not re.match("#",line0):
        tmpdata=line0.split()
        res=np.append(res,np.float(tmpdata[0]))
        tmp=np.array([np.float(tmpdata[2]),np.float(tmpdata[3])])
        r1data=np.append(r1data,tmp)
        tmp=np.array([np.float(tmpdata[4]),np.float(tmpdata[5])])
        r2data=np.append(r2data,tmp)
        tmp=np.array([np.float(tmpdata[6]),np.float(tmpdata[7])])
        noedata=np.append(noedata,tmp)


gammafile.close()

res=res.reshape(int(len(res)/4),4)
res=res[:,0]
r1data=r1data.reshape(int(len(r1data)/8),8)
r2data=r2data.reshape(int(len(r2data)/8),8)
noedata=noedata.reshape(int(len(noedata)/8),8)

# %% [markdown]
# Spectral density mapping

The first steps in reduced spectral density mapping are to determine:

$\sigma_{NH}=(NOE-1)*R_1*(\gamma_N/\gamma_H)$

$J(0.87\omega_H)=4\sigma_{NH}/(5d_{NH})$

$J(\omega_N)=4(R_1 - 1.249\sigma_{NH})/(3*d_{NH}+4c_{NH})$

$\Gamma = R_2-0.5R_1-0.454\sigma_{NH} = (1/6)(3 d_{NH}+4c_{NH})J(0) + R_{ex}$

in which $d_{NH}$ and $c_{NH}$ are the dipole and CSA coupling constants. Errors are propagated from errors in 
rate constants.

$R_{ex}=0$ for this data set.


# %% [code]
#calculate gamma,J(wN),J(0.87wH)

scale = (1.0/6.0)*(3*dd+4*cc)*1e-9

rcross=np.zeros(noedata.shape)
gamma=np.zeros(r2data.shape)
jwn=np.zeros(r1data.shape)
j0ind = np.zeros(r2data.shape)

for i in range(0,len(res)):
    for k in range(0,len(B0)):
        
        #calculate sigmaHN
        rcross[i,2*k] = (noedata[i,2*k] - 1) * r1data[i,2*k] * gamman / gammah
        rcross[i,2*k+1]=rcross[i,2*k]*np.sqrt((noedata[i,2*k+1] / (noedata[i,2*k]-1))**2 + (r1data[i,2*k+1] / r1data[i,2*k])**2)  

        #calculate J(wN)
        jwn[i,2*k]=(r1data[i,2*k] - 7*(0.87/0.921)**2*rcross[i,2*k]/5)/(3*dd/4+cc[k])*1e9
        jwn[i,2*k+1]=np.sqrt(r1data[i,2*k+1]**2 + (49.0/25.0)*(0.87/0.921)**4*(rcross[i,2*k+1])**2)/(3*dd/4+cc[k])*1e9
        
        #calculate Gamma
        gamma[i,2*k] = (-0.5*r1data[i,2*k] + r2data[i,2*k] - 0.454*rcross[i,2*k])
        gamma[i,2*k+1] = np.sqrt(0.25*r1data[i,2*k+1]**2 + r2data[i,2*k+1]**2 + 0.454**2 * rcross[i,2*k+1]**2)
        
        #calculate individual J(0)
        j0ind[i,2*k] = gamma[i,2*k]/scale[k]
        j0ind[i,2*k+1] = gamma[i,2*k+1]/scale[k]

#Calculate J(0.87wH)
j87wH=4.0*rcross/(5*dd)*1e9

# %% [code]
#plot of Gamma at 4 fields

plt.figure()
#plt.axes(xlim=(0,5), ylim=(-1, 1))
plt.ylabel(r'$\Gamma$ (1/s)',fontsize=18)
plt.xlabel(r'Residue',fontsize=18)
plt.errorbar(res,gamma[:,0],yerr=gamma[:,1],marker='o',c=Blue)
plt.errorbar(res,gamma[:,2],yerr=gamma[:,3],marker='o',c=Green)
plt.errorbar(res,gamma[:,4],yerr=gamma[:,5],marker='o',c=ReddishPurple)
plt.errorbar(res,gamma[:,6],yerr=gamma[:,7],marker='o',c=Orange)

plt.show()

# %% [code]
# fit gamma to determine J(0)

"""
The uncertainties in J(0) can be obtained from either the error estimates of the least squares fit
or by jackknife simulations. Which error estimates are used in subsequent calculations is determined
by the boolean variable USEJACK
"""

USEJACK = True

chisq0=np.zeros(len(res))
fj0=np.zeros(len(res))
ej0=np.zeros(len(res))
ej0jack=np.zeros(len(res))

xrange=np.array([0,5.0])

for n in range(0,len(res)):
    chisq0[n],fj0[n],ej0jack[n]=linlsqfitnointercept(scale,gamma[n,0:8:2],gamma[n,1:8:2],error='jack')

if USEJACK:
    masterj0=np.append(fj0,ej0jack)
else:
    masterj0=np.append(fj0,ej0)
    
masterj0=np.append(res,masterj0).reshape(3,len(fj0)).transpose()

j0=masterj0

# %% [code]
#plot of spectral density values at 4 fields

plt.figure(figsize=(20,12))

plt.subplot(1,3,1,aspect=60/8)
plt.ylabel(r'$J(0)$ (1/s)',fontsize=18)
plt.xlabel(r'Residue',fontsize=18)
plt.errorbar(res,j0[:,1],yerr=j0[:,2],marker='o',c='black')
plt.xlim(0,60)
plt.ylim(0,8)
plt.text(2.5, 0.9*8,"(a)",fontsize=18)


plt.subplot(1,3,2,aspect=60/0.25)
plt.xlabel(r'Residue',fontsize=18)
plt.ylabel(r'$J(\omega_N)$ (1/s)',fontsize=18)
plt.errorbar(res,jwn[:,0],yerr=jwn[:,1],marker='o',c=Blue)
plt.errorbar(res,jwn[:,2],yerr=jwn[:,3],marker='o',c=Green)
plt.errorbar(res,jwn[:,4],yerr=jwn[:,5],marker='o',c=ReddishPurple)
plt.errorbar(res,jwn[:,6],yerr=jwn[:,7],marker='o',c=Orange)
plt.xlim(0,60)
plt.ylim(0,0.25)
plt.text(2.5, 0.25*0.0015/0.035,"(b)",fontsize=18)

plt.subplot(1,3,3,aspect=60/0.035)
plt.xlabel(r'Residue',fontsize=18)
plt.ylabel(r'$J(0.87\omega_H)$ (1/s)',fontsize=18)
plt.errorbar(res,j87wH[:,0],yerr=j87wH[:,1],marker='o',c=Blue)
plt.errorbar(res,j87wH[:,2],yerr=j87wH[:,3],marker='o',c=Green)
plt.errorbar(res,j87wH[:,4],yerr=j87wH[:,5],marker='o',c=ReddishPurple)
plt.errorbar(res,j87wH[:,6],yerr=j87wH[:,7],marker='o',c=Orange)
plt.xlim(0,60)
plt.ylim(0,0.035)
plt.text(2.5, 0.0015,"(c)",fontsize=18)
plt.text(45,0.03,"600 MHz",fontsize=18,color=Blue)
plt.text(45,0.028,"700 MHz",fontsize=18,color=Green)
plt.text(45,0.026,"800 MHz",fontsize=18,color=ReddishPurple)
plt.text(45,0.024,"900 MHz",fontsize=18,color=Orange)

plt.savefig('GCN4sdm.png',dpi=300,bbox_inches = 'tight',pad_inches = 0)


plt.show()

# %% [markdown]
# Fit spectral density with 4 models and local correlation time in helix

# %% [code]
"""Non-linear fits of models 1-4 are made to the spectral density values.
Residues 26 through 55 are in the ordered helix and local tm values are fit for these residues to account for
diffusion anisotropy. Other residues are fit with a fixed value tm. Model selection by AICc."""


ndat = 9
nmodels = len(models)
nres = len(res)

tm = 17.5
TmGrid = np.linspace(15,25,20)

jwdat=np.concatenate((np.array([j0[:,1]]).T,jwn[:,0:8:2],j87wH[:,0:8:2]),axis=1)
jwerr=np.concatenate((np.array([j0[:,2]]).T,jwn[:,1:8:2],j87wH[:,1:8:2]),axis=1)

chisq = np.zeros([nres,nmodels])
AICc = np.zeros([nres,nmodels])

model1 = np.zeros([nres,2])
model2 = np.zeros([nres,3])
model3 = np.zeros([nres,4])
model4 = np.zeros([nres,5])
AllModels = [model1,model2,model3,model4]

Nmonte = 500
model1Monte = np.zeros([nres,2,Nmonte])
model2Monte = np.zeros([nres,3,Nmonte])
model3Monte = np.zeros([nres,4,Nmonte])
model4Monte = np.zeros([nres,5,Nmonte])
AllMonte = [model1Monte,model2Monte,model3Monte,model4Monte]

Montechisq = np.zeros([nres,nmodels,Nmonte])
MonteAICc = np.zeros([nres,nmodels,Nmonte])

#loop over models
for m,val in enumerate(models):
    print("\n\nModel", m+1,models[m])
    model = modelDictionary[val]
    
    #generate initial values
    inppFix = GridSearch(allfields, jwdat, jwerr, model,tm)
    inpp0 = GridSearch(allfields, jwdat, jwerr, model,TmGrid)

    for n,val in enumerate(res):
        print(int(val),' ',end='')
    
        fixflag = True
        # comment the following if statement to fix tm for all residues
        if n >= 22 and n < 46:
            fixflag = False
    
        # fit model m
        if fixflag:
            chisq[n,m],AICc[n,m],AllModels[m][n,:],Montetmp = fitMF(model,allfields,
                                                jwdat[n,:],jwerr[n,:],inppFix[n,:],Nmonte,fixflag)
        else:
            chisq[n,m],AICc[n,m],AllModels[m][n,:],Montetmp = fitMF(model,allfields,
                                                jwdat[n,:],jwerr[n,:],inpp0[n,:],Nmonte,fixflag)
        
        AllMonte[m][n,:,:] = Montetmp[:-2,:]
        Montechisq[n,m,:] = Montetmp[-2,:]
        MonteAICc[n,m,:] = Montetmp[-1,:]
    
    

# %% [code]
# Parameter uncertaities from Monte Carlo simulations

model1Jmonte = np.zeros([nres,2])
model1Jerr = np.zeros([nres,2])

model2Jmonte = np.zeros([nres,3])
model2Jerr = np.zeros([nres,3])
                         
model3Jmonte = np.zeros([nres,5])
model3Jerr = np.zeros([nres,5])

model4Jmonte = np.zeros([nres,6])
model4Jerr = np.zeros([nres,6])

modelJMonte = [model1Jmonte,model2Jmonte,model3Jmonte,model4Jmonte]
modelJerr = [model1Jerr,model2Jerr,model3Jerr,model4Jerr]

model1JmonteTrim = np.zeros([nres,2])
model1JerrTrim = np.zeros([nres,2])

model2JmonteTrim = np.zeros([nres,3])
model2JerrTrim = np.zeros([nres,3])
                         
model3JmonteTrim = np.zeros([nres,5])
model3JerrTrim = np.zeros([nres,5])

model4JmonteTrim = np.zeros([nres,6])
model4JerrTrim = np.zeros([nres,6])

modelJMonteTrim = [model1JmonteTrim,model2JmonteTrim,model3JmonteTrim,model4JmonteTrim]
modelJerrTrim = [model1JerrTrim,model2JerrTrim,model3JerrTrim,model4JerrTrim]

cutlow = 0.05
cuthigh = 0.95
for m,model in enumerate(models):
    for n, resnum in enumerate(res):
        temp = AllMonte[m][n,:,:]
        if model == 'Jmf3' or model == 'Jmf4' :
            s2 = temp[1,:]*temp[2,:]
            temp = np.vstack((temp,s2))
        if model == 'Jmf4':
            temp[4,:] = temp[3,:]+temp[4,:]
            
        modelJMonte[m][n,:] = np.mean(temp,axis=1)
        modelJerr[m][n,:] = np.std(temp,axis=1)
        
        temp = np.sort(temp,axis=1)
        temp = temp[:,int(Nmonte*cutlow):int(Nmonte*cuthigh)]
        modelJMonteTrim[m][n,:] = np.mean(temp,axis=1)
        modelJerrTrim[m][n,:] = np.std(temp,axis=1)
        

# %% [code]
# Plot results

fig=plt.figure(figsize=(8,128))

xr=np.linspace(0,5,100)

for n,val in enumerate(res):
    
    tsum1="AIC: "+"{0:.1f}".format(AICc[n,0])
    tsum1=tsum1+"\ntm: "+"{0:.3f} ns".format(model1[n,0])
    tsum1=tsum1+"\nS2: "+"{0:.3f}".format(model1[n,1])
    jfit1 = Jmf1(xr,*model1[n,:])
    
    tsum2="AIC: "+"{0:.1f}".format(AICc[n,1])
    tsum2=tsum2+"\ntm: "+"{0:.3f} ns".format(model2[n,0])
    tsum2=tsum2+"\nS2: "+"{0:.3f}".format(model2[n,1])
    tsum2=tsum2+"\nte: "+"{0:.3f} ps".format(model2[n,2])
    jfit2 = Jmf2(xr,*model2[n,:])
    
    tsum3="AIC: "+"{0:.1f}".format(AICc[n,2])
    tsum3=tsum3+"\ntm: "+"{0:.3f} ns".format(model3[n,0])
    tsum3=tsum3+"\nS2: "+"{0:.3f}".format(model3[n,1]*model3[n,2])
    tsum3=tsum3+"\nSf2: "+"{0:.3f}".format(model3[n,1])
    tsum3=tsum3+"\nSs2: "+"{0:.3f}".format(model3[n,2])
    tsum3=tsum3+"\nts: "+"{0:.4f} ns".format(model3[n,3])
    jfit3 = Jmf3(xr,*model3[n,:])
            
    tsum4="AIC: "+"{0:.1f}".format(AICc[n,3])
    tsum4=tsum4+"\ntm: "+"{0:.3f} ns".format(model4[n,0])
    tsum4=tsum4+"\nS2: "+"{0:.3f}".format(model4[n,1]*model4[n,2])
    tsum4=tsum4+"\nSf2: "+"{0:.3f}".format(model4[n,1])
    tsum4=tsum4+"\nSs2: "+"{0:.3f}".format(model4[n,2])
    tsum4=tsum4+"\ntf: "+"{0:.4f} ns".format(model4[n,3])
    tsum4=tsum4+"\nts: "+"{0:.3f} ns".format(model4[n,3]+model4[n,4])
    jfit4 = Jmf4(xr,*model4[n,:])
    
    # Plot results
    plt.subplot(len(res),2,2*n+1)
    plt.ylabel(r'$log(J(\omega )/(1 ns)$')
    if n == len(res)-1:
        plt.xlabel(r'$\omega$ (1/ns)')
    plt.xlim(0,5.0)
    plt.title('Residue '+str(val))
    
    plt.errorbar(allfields, np.log10(jwdat[n,:]), yerr=jwerr[n,:]/jwdat[n,:], fmt='o',c='black')
    plt.plot(xr,np.log10(jfit1),lw=2,c='black')
    plt.plot(xr,np.log10(jfit2),lw=2,c=Blue)
    
    plt.text(1,-0.7,tsum1,color='black')
    plt.text(3,-1,tsum2,color=Blue)
    
    plt.subplot(len(res),2,2*n+2)
    
    if n == len(res)-1:
        plt.xlabel(r'$\omega$ (1/ns)')
    plt.xlim(0,5.0)
    
    plt.errorbar(allfields, np.log10(jwdat[n,:]), yerr=jwerr[n,:]/jwdat[n,:], fmt='o',c='black')
    plt.plot(xr,np.log10(jfit3),lw=2,c=ReddishPurple)
    plt.plot(xr,np.log10(jfit4),lw=2,c=Orange)
    
    plt.text(1,-1,tsum3,color=ReddishPurple)
    plt.text(3,-1.5,tsum4,color=Orange)
    
plt.show()

# %% [code]
# Use AICc to select optimal model for non-linear fitting

bestModelNL = np.zeros(len(res))
secondModelNL = np.zeros(len(res))

print('AICc Nonlinear Model Selection')
print('\nResidue\tModel\tBestAIC\t\tModel1\t\tModel2\t\tModel3\t\tModel4')
for n,val in enumerate(res):
    
    bestModelNL[n] = np.argsort(AICc[n,:])[0]+1
    secondModelNL[n] = np.argsort(AICc[n,:])[1]+1
    
    print('{0}\t{1}\t{2:8.3f}\t{3:8.3f}\t{4:8.3f}\t{5:8.3f}\t{6:8.3f}'.format(
        res[n].astype(int),bestModelNL[n].astype(int),np.min(AICc[n,:]),AICc[n,0],AICc[n,1],AICc[n,2],AICc[n,3]))

# %% [code]
# Print output table for best models selected with nonlinear model selection

Tfcut = 0.15

bestTm = np.zeros(len(res))
bestTmerr = np.zeros(len(res))
bestTmerrTrim = np.zeros(len(res))
bestS2 = np.zeros(len(res))
bestS2err = np.zeros(len(res))
bestS2errTrim = np.zeros(len(res))
bestSf2 = np.ones(len(res))
bestSf2err = np.zeros(len(res))
bestSf2errTrim = np.zeros(len(res))
bestSs2 = np.ones(len(res))
bestSs2err = np.zeros(len(res))
bestSs2errTrim = np.zeros(len(res))
bestTf = np.zeros(len(res))
bestTferr = np.zeros(len(res))
bestTferrTrim = np.zeros(len(res))
bestTs = np.zeros(len(res))
bestTserr = np.zeros(len(res))
bestTserrTrim = np.zeros(len(res))

print('Best model parameters\n')
print('Residue\tModel\ttm\tS2\t\tSf2\t\tSs2\t\t\ttf\t\tts')

for n,val in enumerate(res):
    if bestModelNL[n] == 1:
        print('{0:3d} 1  {1:5.2f} +/- {2:5.2f}  {3:5.3f} +/- {4:5.3f}'.
              format(np.int(val),model1[n,0],model1Jerr[n,0],model1[n,1],model1Jerr[n,1]))
        bestTm[n] = model1[n,0]
        bestTmerr[n] = model1Jerr[n,0]
        bestTmerrTrim[n] = model1JerrTrim[n,0]
        bestS2[n] = model1[n,1]
        bestS2err[n] = model1Jerr[n,1]
        bestS2errTrim[n] = model1JerrTrim[n,1]
        bestSf2[n] = model1[n,1]
        bestSf2err[n] = model1Jerr[n,1]
        bestSf2errTrim[n] = model1JerrTrim[n,1]
    elif bestModelNL[n] == 2:
        if model2[n,2] < Tfcut:
            print('{0:3d} 2  {1:5.2f} +/- {2:5.2f}  {3:5.3f} +/- {4:5.3f}\t\t\t\t\t  {5:5.3f} +/- {6:5.3f}'.
              format(np.int(val),model2[n,0],model2Jerr[n,0],model2[n,1],model2Jerr[n,1],model2[n,2],model2Jerr[n,2]))
            bestTm[n] = model2[n,0]
            bestTmerr[n] = model2Jerr[n,0]
            bestTmerrTrim[n] = model2JerrTrim[n,0]
            bestS2[n] = model2[n,1]
            bestS2err[n] = model2Jerr[n,1]
            bestS2errTrim[n] = model2JerrTrim[n,1]
            bestSf2[n] = model2[n,1]
            bestSf2err[n] = model2Jerr[n,1]
            bestSf2errTrim[n] = model2JerrTrim[n,1]
            bestTf[n] = model2[n,2]
            bestTferr[n] = model2Jerr[n,2]
            bestTferrTrim[n] = model2JerrTrim[n,2]
        else:
            print('{0:3d} 2  {1:5.2f} +/- {2:5.2f}  {3:5.3f} +/- {4:5.3f}\t\t\t\t\t\t\t   {5:5.3f} +/- {6:5.3f}'.
              format(np.int(val),model2[n,0],model2Jerr[n,0],model2[n,1],model2Jerr[n,1],model2[n,2],model2Jerr[n,2]))
            bestTm[n] = model2[n,0]
            bestTmerr[n] = model2Jerr[n,0]
            bestTmerrTrim[n] = model2JerrTrim[n,0]
            bestS2[n] = model2[n,1]
            bestS2err[n] = model2Jerr[n,1]
            bestS2errTrim[n] = model2JerrTrim[n,1]
            bestSs2[n] = model2[n,1]
            bestSs2err[n] = model2Jerr[n,1]
            bestSs2errTrim[n] = model2JerrTrim[n,1]
            bestTs[n] = model2[n,2]
            bestTserr[n] = model2Jerr[n,2]
            bestTserrTrim[n] = model2JerrTrim[n,2]
    elif bestModelNL[n] == 3:
        print('{0:3d} 3  {1:5.2f} +/- {2:5.2f}  {3:5.3f} +/- {4:5.3f}  {5:5.3f} +/- {6:5.3f}  {7:5.3f} +/- {8:5.3f}\t\t   {9:5.3f} +/- {10:5.3f}'.
              format(np.int(val),model3[n,0],model3Jerr[n,0],model3[n,1]*model3[n,2],model3Jerr[n,4],
                     model3[n,1],model3Jerr[n,1],model3[n,2],model3Jerr[n,2],model3[n,3],model3Jerr[n,3]))
        bestTm[n] = model3[n,0]
        bestTmerr[n] = model3Jerr[n,0]
        bestTmerrTrim[n] = model3JerrTrim[n,0]
        bestS2[n] = model3[n,1]*model3[n,2]
        bestS2err[n] = model3Jerr[n,4]
        bestS2errTrim[n] = model3JerrTrim[n,4]
        bestSf2[n] = model3[n,1]
        bestSf2err[n] = model3Jerr[n,1]
        bestSf2errTrim[n] = model3JerrTrim[n,1]
        bestSs2[n] = model3[n,2]
        bestSs2err[n] = model3Jerr[n,2]
        bestSs2errTrim[n] = model3JerrTrim[n,2]
        bestTs[n] = model3[n,3]
        bestTserr[n] = model3Jerr[n,3]
        bestTserrTrim[n] = model3JerrTrim[n,3]
    else:
        print('{0:3d} 4  {1:5.2f} +/- {2:5.2f}  {3:5.3f} +/- {4:5.3f}  {5:5.3f} +/- {6:5.3f}  {7:5.3f} +/- {8:5.3f} {9:5.3f} +/- {10:5.3f}  {11:5.3f} +/- {12:5.3f}'.
              format(np.int(val),model4[n,0],model4Jerr[n,0],model4[n,1]*model4[n,2],model4Jerr[n,5],
                     model4[n,1],model4Jerr[n,1],model4[n,2],model4Jerr[n,2],model4[n,3],model4Jerr[n,3],
                     model4[n,3]+model4[n,4],model4Jerr[n,4]))
        bestTm[n] = model4[n,0]
        bestTmerr[n] = model4Jerr[n,0]
        bestTmerrTrim[n] = model4JerrTrim[n,0]
        bestS2[n] = model4[n,1]*model4[n,2]
        bestS2err[n] = model4Jerr[n,5]
        bestS2errTrim[n] = model4JerrTrim[n,5]
        bestSf2[n] = model4[n,1]
        bestSf2err[n] = model4Jerr[n,1]
        bestSf2errTrim[n] = model4JerrTrim[n,1]
        bestSs2[n] = model4[n,2]
        bestSs2err[n] = model4Jerr[n,2]
        bestSs2errTrim[n] = model4JerrTrim[n,2]
        bestTf[n] = model4[n,3]
        bestTferr[n] = model4Jerr[n,3]
        bestTferrTrim[n] = model4JerrTrim[n,3]
        bestTs[n] = model4[n,3]+model4[n,4]
        bestTserr[n] = model4Jerr[n,4]
        bestTserrTrim[n] = model4JerrTrim[n,4]
    

# %% [code]
# plot the best-model fitted parameters

print('Single model fit with Monte Carlo uncertainties')

fig=plt.figure(figsize=(24/2.54,22/2.54))

#Plot S2
xmin=0.0
xmax=60.0
ymin=0.0
ymax=1.05
xdel=xmax-xmin
ydel=ymax-ymin
arat=xdel/ydel*0.618

plt.subplot(3,2,1,aspect=arat)

plt.ylabel(r'$S^2$',fontsize='14')
#plt.xlabel(r'Residue',fontsize='18')
plt.xlim(xmin,xmax)
plt.ylim(ymin,ymax)

plt.errorbar(res[22:46],bestS2[22:46],yerr=bestS2err[22:46],lw=2,fmt='o', color='black')
plt.errorbar(res[0:9],bestS2[0:9],yerr=bestS2err[0:9],lw=2,fmt='o', c=ReddishPurple,
             markeredgecolor=ReddishPurple)
plt.errorbar(res[9:22],bestS2[9:22],yerr=bestS2err[9:22],lw=2,fmt='o', c=Green,
             markeredgecolor=Green)
plt.errorbar(res[46:],bestS2[46:],yerr=bestS2err[46:],lw=2,fmt='o',color=Orange,
             markeredgecolor=Orange)
plt.text(2.5,0.90,"(a)",fontsize=14)

#plot tauM
xmin=0.0
xmax=60.0
ymin=10.0
ymax=22.0
xdel=xmax-xmin
ydel=ymax-ymin
arat=xdel/ydel*0.618

plt.subplot(3,2,2,aspect=arat)
plt.ylabel(r'$\tau_m$ (ns)',fontsize='14')
plt.ylim((ymin,ymax))

plt.errorbar(res[22:46],bestTm[22:46],yerr=bestTmerr[22:46],lw=2,fmt='o', color='black')
plt.errorbar(res[0:9],bestTm[0:9],yerr=bestTmerr[0:9],lw=2,fmt='o', c=ReddishPurple,
             markeredgecolor=ReddishPurple)
plt.errorbar(res[9:22],bestTm[9:22],yerr=bestTmerr[9:22],lw=2,fmt='o', c=Green,
             markeredgecolor=Green)
plt.errorbar(res[46:],bestTm[46:],yerr=bestTmerr[46:],lw=2,fmt='o',color=Orange,
             markeredgecolor=Orange)
plt.text(2.5,0.9*12/1.05+10,"(b)",fontsize=14)

#Plot Sf2
xmin=0.0
xmax=60.0
ymin=0.0
ymax=1.05
xdel=xmax-xmin
ydel=ymax-ymin
arat=xdel/ydel*0.618
plt.subplot(3,2,3,aspect=arat)

plt.ylabel(r'$S_f^2$',fontsize='14')
#plt.xlabel(r'Residue',fontsize='18')
plt.xlim(xmin,xmax)
plt.ylim(ymin,ymax)

plt.errorbar(res[22:46],bestSf2[22:46],yerr=bestSf2err[22:46],lw=2,fmt='o', color='black')
plt.errorbar(res[0:9],bestSf2[0:9],yerr=bestSf2err[0:9],lw=2,fmt='o', c=ReddishPurple,
             markeredgecolor=ReddishPurple)
plt.errorbar(res[9:22],bestSf2[9:22],yerr=bestSf2err[9:22],lw=2,fmt='o', c=Green,
             markeredgecolor=Green)
plt.errorbar(res[46:],bestSf2[46:],yerr=bestSf2err[46:],lw=2,fmt='o',color=Orange,
             markeredgecolor=Orange)
plt.text(2.5,0.90,"(c)",fontsize=14)

#plot tauF
xmin=0.0
xmax=60.0
ymin=0.0
ymax=0.15
xdel=xmax-xmin
ydel=ymax-ymin
arat=xdel/ydel*0.618

plt.subplot(3,2,4,aspect=arat)
plt.ylabel(r'$\tau_f$ (ns)',fontsize='14')
plt.ylim((ymin,ymax))

plt.errorbar(res[22:46],bestTf[22:46],yerr=bestTferr[22:46],lw=2,fmt='o', color='black')
plt.errorbar(res[0:9],bestTf[0:9],yerr=bestTferr[0:9],lw=2,fmt='o', c=ReddishPurple,
             markeredgecolor=ReddishPurple)
plt.errorbar(res[9:22],bestTf[9:22],yerr=bestTferr[9:22],lw=2,fmt='o', c=Green,
             markeredgecolor=Green)
plt.errorbar(res[46:],bestTf[46:],yerr=bestTferr[46:],lw=2,fmt='o',color=Orange,
             markeredgecolor=Orange)
plt.text(2.5,0.90*0.15/1.05,"(d)",fontsize=14)

#Plot Ss2
xmin=0.0
xmax=60.0
ymin=0.0
ymax=1.05
xdel=xmax-xmin
ydel=ymax-ymin
arat=xdel/ydel*0.618
plt.subplot(3,2,5,aspect=arat)

plt.xlabel(r'Residue',fontsize='14')
plt.ylabel(r'$S_s^2$',fontsize='14')
#plt.xlabel(r'Residue',fontsize='18')
plt.xlim(xmin,xmax)
plt.ylim(ymin,ymax)

plt.errorbar(res[22:46],bestSs2[22:46],yerr=bestSs2err[22:46],lw=2,fmt='o', color='black')
plt.errorbar(res[0:9],bestSs2[0:9],yerr=bestSs2err[0:9],lw=2,fmt='o', c=ReddishPurple,
             markeredgecolor=ReddishPurple)
plt.errorbar(res[9:22],bestSs2[9:22],yerr=bestSs2err[9:22],lw=2,fmt='o', c=Green,
             markeredgecolor=Green)
plt.errorbar(res[46:],bestSs2[46:],yerr=bestSs2err[46:],lw=2,fmt='o',color=Orange,
             markeredgecolor=Orange)
plt.text(2.5,0.90,"(e)",fontsize=14)

#plot tauS
xmin=0.0
xmax=60.0
ymin=0.0
ymax=5
xdel=xmax-xmin
ydel=ymax-ymin
arat=xdel/ydel*0.618

plt.subplot(3,2,6,aspect=arat)
plt.xlabel(r'Residue',fontsize='14')
plt.ylabel(r'$\tau_s$ (ns)',fontsize='14')
#plt.xlabel(r'Residue',fontsize='18')
plt.xlim(xmin,xmax)
plt.ylim(ymin,ymax)

plt.errorbar(res[22:46],bestTs[22:46],yerr=bestTserr[22:46],lw=2,fmt='o', color='black')
plt.errorbar(res[0:9],bestTs[0:9],yerr=bestTserr[0:9],lw=2,fmt='o', c=ReddishPurple,
             markeredgecolor=ReddishPurple)
plt.errorbar(res[9:22],bestTs[9:22],yerr=bestTserr[9:22],lw=2,fmt='o', c=Green,
             markeredgecolor=Green)
plt.errorbar(res[46:],bestTs[46:],yerr=bestTserr[46:],lw=2,fmt='o',color=Orange,
             markeredgecolor=Orange)
plt.text(2.5,5*0.9/1.05,"(f)",fontsize=14)


plt.savefig('GCN4sdmMFMontebest.pdf',bbox_inches = 'tight',pad_inches = 0)
plt.savefig('GCN4sdmMFMontebest.png',dpi=300,bbox_inches = 'tight',pad_inches = 0)


plt.show()

# %% [markdown]
## Bootstrap J(0)

# %% [code]
#Bootstrap of gamma to determine J(0)
#Replace only up to two elements

"""
The uncertainties in J(0) can be obtained from either the error estimates of the least squares fit
or by jackknife simulations. Which error estimates are used in subsequent calculations is determined
by the boolean variable USEJACK
"""

USEJACK = True

bootpointer = np.array([[1,2,3,4],
                [1,1,3,4],
               [1,2,1,4],
               [1,2,3,1],
               [2,2,3,4],
               [1,2,2,4],
               [1,2,3,2],
               [3,2,3,4],
               [1,3,3,4],
               [1,2,3,3],
               [4,2,3,4],
               [1,4,3,4],
               [1,2,4,4],
                [1,1,2,2],
                [1,1,3,3],
                [1,1,4,4],
                [2,2,3,3],
                [2,2,4,4],
                [3,3,4,4]        
              ])-1
bootY = np.array([[1,1,1,1],
                [2,0,1,1],
                [2,1,0,1],
               [2,1,1,0],
               [0,2,1,1],
               [1,2,0,1],
               [1,2,1,0],
               [0,1,2,1],
               [1,0,2,1],
               [1,1,2,0],
               [0,1,1,2],
               [1,0,1,2],
               [1,1,0,2],
                  [2,2,0,0],
                  [2,0,2,0],
                  [2,0,0,2],
                  [0,2,2,0],
                  [0,2,0,2],
                  [0,0,2,2]
              ])

Nreplace = bootpointer.shape[0]

chisq0=np.zeros(len(res))
bootj0=np.zeros([len(res),Nreplace])
bootej0=np.zeros([len(res),Nreplace])

for n in range(0,len(res)):
    for k in range(0,Nreplace):
        x = gamma[n,0:8:2]
        dx = gamma[n,1:8:2]
        chisqtmp,bootj0[n,k],bootej0[n,k]=linlsqfitnointercept(scale,x[bootpointer[k,:]],dx[bootpointer[k,:]])


fig=plt.figure(figsize=(12,8))
colormat = (Blue,Green,Orange,ReddishPurple)

plt.subplot(2,2,1)
plt.ylabel(r'$J(0)$ (ns)',fontsize=14)
plt.xlabel('Residue',fontsize=14)
plt.errorbar(res, j0[:,1], yerr=j0[:,2], fmt='.',c='black')
           
for k in range(0,Nreplace):
    plt.plot(res,bootj0[:,k],marker='.',lw=0,c=ReddishPurple)
plt.ylim(0,10)

plt.subplot(2,2,2)
plt.ylabel(r'$(J(0)[Boot]-J(0)/J(0)$',fontsize=14)
plt.xlabel('Residue',fontsize=14)
           
for k in range(0,Nreplace):
    plt.plot(res,(bootj0[:,k]-j0[:,1])/j0[:,1],marker='.',lw=0,c=ReddishPurple)

plt.subplot(2,2,3)
plt.ylabel(r'$J(0)$ (ns)',fontsize=14)
plt.xlabel('Residue',fontsize=14)
           
for k in range(0,4):
    plt.errorbar(res,j0ind[:,2*k],yerr=j0ind[:,2*k+1],fmt='o',c=colormat[k])
plt.errorbar(res, j0[:,1], yerr=j0[:,2], fmt='o',c='black')
plt.ylim(0,10)

plt.subplot(2,2,4)
plt.ylabel(r'$J(0)$ [Individual] (ns)',fontsize=14)
plt.xlabel(r'$J(0)$ [Fit] (ns)',fontsize=14)
           
colormat = (Blue,Green,Orange,ReddishPurple,)
for k in range(0,4):
    plt.errorbar(j0[:,1],j0ind[:,2*k],xerr=j0[:,2],yerr=j0ind[:,2*k+1],fmt='o',c=colormat[k])
    
plt.plot(np.array([0,10]),np.array([0,10]))

plt.xlim(0,10)
plt.ylim(0,10)


plt.show()

# %% [markdown]
## Bootstrap Aggregation

# %% [code]
ndat = 9
nmodels = len(models)
nres = len(res)
Nboot = Nreplace**3

tm = 17.5
TmGrid = np.linspace(15,25,20)

model1Agg = np.zeros([nres,2,Nboot])
model2Agg = np.zeros([nres,3,Nboot])
model3Agg = np.zeros([nres,4,Nboot])
model4Agg = np.zeros([nres,5,Nboot])

AllAgg = [model1Agg,model2Agg,model3Agg,model4Agg]
Aggchisq = np.zeros([nres,nmodels,Nboot])
AggAICc = np.zeros([nres,nmodels,Nboot])

#loop over models
for m,val in enumerate(models):
    print("\n\nModel", m+1)
    model = modelDictionary[val]
    
    #generate grid for model m
    gridparFix,gridFix = GenerateGrid(allfields, model,tm)
    gridpar0,grid0 = GenerateGrid(allfields, model,TmGrid)
    
    for nn,residue in enumerate(res):
        for i,vv in enumerate(res):
            if vv == residue:
                val = vv
                n = i
        print(int(val),' ',end='')
        
        tmpjwn = jwn[n,0:8:2]
        tmpjwh = j87wH[n,0:8:2]
        tmpejwn = jwn[n,1:8:2]
        tmpejwh = j87wH[n,1:8:2]
    
        bootindx = -1
        for nj0 in range(0,Nreplace):
            for njwn in range(0,Nreplace):
                for njwh in range(0,Nreplace):
                    bootindx = bootindx + 1
                    
                    #create data vector
                    tmpdat=np.concatenate([np.array([bootj0[n,nj0]]),
                                       tmpjwn[bootpointer[njwn,:]],tmpjwh[bootpointer[njwh,:]]])
                    tmperr=np.concatenate([np.array([bootej0[n,nj0]]),
                                       tmpejwn[bootpointer[njwn,:]],tmpejwh[bootpointer[njwh,:]]])
                
                    tempN = allfields[1:5][bootpointer[njwn,:]]
                    tempH = allfields[5:][bootpointer[njwh,:]]
                    tmpfields = np.concatenate([np.array([allfields[0]]),tempN,tempH])
                    tmppointer = np.concatenate([np.array([0]),bootpointer[njwn,:]+1,bootpointer[njwh,:]+5])
                
                    fixflag = True
                    # comment the following if statement to fix tm for all residues
                    if val >= 26 and val < 56:
                        fixflag = False
                    
                    # fit model m
                    if bootindx == 0:
                        if fixflag:
                            inpp0 = SearchGrid1(tmppointer,tmpdat, tmperr,model,gridparFix,gridFix)
                        else:
                            inpp0 = SearchGrid1(tmppointer,tmpdat, tmperr,model,gridpar0,grid0)
                    else:
                         inpp0 = AllAgg[m][n,:,0]   
                            
                    Aggchisq[n,m,bootindx],AggAICc[n,m,bootindx],AllAgg[m][n,:,bootindx] = fitMF(model,
                                                tmpfields,tmpdat,tmperr,inpp0,0,fixflag)

         

# %% [code]
# Parameter uncertaities from conventional bootstrap simulations
# Extract from bootindx = 0 to get optimal model for original data

# parameter separating tf from ts in models 2/3
Tfcut = 0.15

model1Jbootagg = np.zeros([nres,2])
model1Jbootaggerr = np.zeros([nres,2])

model2Jbootagg = np.zeros([nres,3])
model2Jbootaggerr = np.zeros([nres,3])
                         
model3Jbootagg = np.zeros([nres,5])
model3Jbootaggerr = np.zeros([nres,5])

model4Jbootagg = np.zeros([nres,6])
model4Jbootaggerr = np.zeros([nres,6])

modelJbootagg = [model1Jbootagg,model2Jbootagg,model3Jbootagg,model4Jbootagg]
modelJbootaggerr = [model1Jbootaggerr,model2Jbootaggerr,model3Jbootaggerr,model4Jbootaggerr]

BootaggbestTmerr = np.zeros(len(res))
BootaggbestS2err = np.zeros(len(res))
BootaggbestSf2err = np.zeros(len(res))
BootaggbestSs2err = np.zeros(len(res))
BootaggbestTferr = np.zeros(len(res))
BootaggbestTserr = np.zeros(len(res))

BootaggbestModel = np.zeros(len(res))

cutlow = 0.1
cuthigh = 0.9

for n, resnum in enumerate(res):
    #get optimal model
    m = np.argsort(AggAICc[n,:,0])[0]
    BootaggbestModel[n] = m + 1
    model = models[m]
    temp = AllAgg[m][n,:,:]
    if model == 'Jmf3' or model == 'Jmf4' :
        s2 = temp[1,:]*temp[2,:]
        temp = np.vstack((temp,s2))
    if model == 'Jmf4':
        temp[4,:] = temp[3,:] + temp[4,:]
    temp = np.sort(temp,axis=1)
    temp = temp[:,int(Nboot*cutlow):int(Nboot*cuthigh)]
    modelJbootagg[m][n,:] = np.mean(temp,axis=1)
    modelJbootaggerr[m][n,:] = np.std(temp,axis=1)
    
    if BootaggbestModel[n] == 1:
        BootaggbestTmerr[n] = model1Jbootaggerr[n,0]
        BootaggbestS2err[n] = model1Jbootaggerr[n,1]
        BootaggbestSf2err[n] = model1Jbootaggerr[n,1]
    elif BootaggbestModel[n] == 2:
        if model2Agg[n,2,0] < Tfcut:
            BootaggbestTmerr[n] = model2Jbootaggerr[n,0]
            BootaggbestS2err[n] = model2Jbootaggerr[n,1]
            BootaggbestSf2err[n] = model2Jbootaggerr[n,1]
            BootaggbestTferr[n] = model2Jbootaggerr[n,2]
        else:
            BootaggbestTmerr[n] = model2Jbootaggerr[n,0]
            BootaggbestS2err[n] = model2Jbootaggerr[n,1]
            BootaggbestSs2err[n] = model2Jbootaggerr[n,1]
            BootaggbestTserr[n] = model2Jbootaggerr[n,2]
    elif BootaggbestModel[n] == 3:
        BootaggbestTmerr[n] = model3Jbootaggerr[n,0]
        BootaggbestS2err[n] = model3Jbootaggerr[n,4]
        BootaggbestSf2err[n] = model3Jbootaggerr[n,1]
        BootaggbestSs2err[n] = model3Jbootaggerr[n,2]
        BootaggbestTserr[n] = model3Jbootaggerr[n,3]
    else:
        BootaggbestTmerr[n] = model4Jbootaggerr[n,0]
        BootaggbestS2err[n] = model4Jbootaggerr[n,5]
        BootaggbestSf2err[n] = model4Jbootaggerr[n,1]
        BootaggbestSs2err[n] = model4Jbootaggerr[n,2]
        BootaggbestTferr[n] = model4Jbootaggerr[n,3]
        BootaggbestTserr[n] = model4Jbootaggerr[n,4]
    

# %% [code]
# plot the best-model fitted parameters

fig=plt.figure(figsize=(24/2.54,22/2.54))

print('Single model fit with bootstrap uncertainties')

#Plot S2
xmin=0.0
xmax=60.0
ymin=0.0
ymax=1.05
xdel=xmax-xmin
ydel=ymax-ymin
arat=xdel/ydel*0.618

plt.subplot(3,2,1,aspect=arat)

plt.ylabel(r'$S^2$',fontsize='14')
#plt.xlabel(r'Residue',fontsize='18')
plt.xlim(xmin,xmax)
plt.ylim(ymin,ymax)

plt.errorbar(res[22:46],bestS2[22:46],yerr=BootaggbestS2err[22:46],lw=2,fmt='o', color='black')
plt.errorbar(res[0:9],bestS2[0:9],yerr=BootaggbestS2err[0:9],lw=2,fmt='o', c=ReddishPurple,
             markeredgecolor=ReddishPurple)
plt.errorbar(res[9:22],bestS2[9:22],yerr=BootaggbestS2err[9:22],lw=2,fmt='o', c=Green,
             markeredgecolor=Green)
plt.errorbar(res[46:],bestS2[46:],yerr=BootaggbestS2err[46:],lw=2,fmt='o',color=Orange,
             markeredgecolor=Orange)
plt.text(2.5,0.90,"(a)",fontsize=14)

#plot tauM
xmin=0.0
xmax=60.0
ymin=10.0
ymax=22.0
xdel=xmax-xmin
ydel=ymax-ymin
arat=xdel/ydel*0.618

plt.subplot(3,2,2,aspect=arat)
plt.ylabel(r'$\tau_m$ (ns)',fontsize='14')
plt.ylim((ymin,ymax))

plt.errorbar(res[22:46],bestTm[22:46],yerr=BootaggbestTmerr[22:46],lw=2,fmt='o', color='black')
plt.errorbar(res[0:9],bestTm[0:9],yerr=BootaggbestTmerr[0:9],lw=2,fmt='o', c=ReddishPurple,
             markeredgecolor=ReddishPurple)
plt.errorbar(res[9:22],bestTm[9:22],yerr=BootaggbestTmerr[9:22],lw=2,fmt='o', c=Green,
             markeredgecolor=Green)
plt.errorbar(res[46:],bestTm[46:],yerr=BootaggbestTmerr[46:],lw=2,fmt='o',color=Orange,
             markeredgecolor=Orange)
plt.text(2.5,0.90*12/1.05+10,"(b)",fontsize=14)

#Plot Sf2
xmin=0.0
xmax=60.0
ymin=0.0
ymax=1.05
xdel=xmax-xmin
ydel=ymax-ymin
arat=xdel/ydel*0.618
plt.subplot(3,2,3,aspect=arat)

plt.ylabel(r'$S_f^2$',fontsize='14')
#plt.xlabel(r'Residue',fontsize='18')
plt.xlim(xmin,xmax)
plt.ylim(ymin,ymax)

plt.errorbar(res[22:46],bestSf2[22:46],yerr=BootaggbestSf2err[22:46],lw=2,fmt='o', color='black')
plt.errorbar(res[0:9],bestSf2[0:9],yerr=BootaggbestSf2err[0:9],lw=2,fmt='o', c=ReddishPurple,
             markeredgecolor=ReddishPurple)
plt.errorbar(res[9:22],bestSf2[9:22],yerr=BootaggbestSf2err[9:22],lw=2,fmt='o', c=Green,
             markeredgecolor=Green)
plt.errorbar(res[46:],bestSf2[46:],yerr=BootaggbestSf2err[46:],lw=2,fmt='o',color=Orange,
             markeredgecolor=Orange)
plt.text(2.5,0.90,"(c)",fontsize=14)

#plot tauF
xmin=0.0
xmax=60.0
ymin=0.0
ymax=0.15
xdel=xmax-xmin
ydel=ymax-ymin
arat=xdel/ydel*0.618

plt.subplot(3,2,4,aspect=arat)
plt.ylabel(r'$\tau_f$ (ns)',fontsize='14')
plt.ylim((ymin,ymax))

plt.errorbar(res[22:46],bestTf[22:46],yerr=BootaggbestTferr[22:46],lw=2,fmt='o', color='black')
plt.errorbar(res[0:9],bestTf[0:9],yerr=BootaggbestTferr[0:9],lw=2,fmt='o', c=ReddishPurple,
             markeredgecolor=ReddishPurple)
plt.errorbar(res[9:22],bestTf[9:22],yerr=BootaggbestTferr[9:22],lw=2,fmt='o', c=Green,
             markeredgecolor=Green)
plt.errorbar(res[46:],bestTf[46:],yerr=BootaggbestTferr[46:],lw=2,fmt='o',color=Orange,
             markeredgecolor=Orange)
plt.text(2.5,0.90*0.15/1.05,"(d)",fontsize=14)

#Plot Ss2
xmin=0.0
xmax=60.0
ymin=0.0
ymax=1.05
xdel=xmax-xmin
ydel=ymax-ymin
arat=xdel/ydel*0.618
plt.subplot(3,2,5,aspect=arat)

plt.xlabel(r'Residue',fontsize='14')
plt.ylabel(r'$S_s^2$',fontsize='14')
#plt.xlabel(r'Residue',fontsize='18')
plt.xlim(xmin,xmax)
plt.ylim(ymin,ymax)

plt.errorbar(res[22:46],bestSs2[22:46],yerr=BootaggbestSs2err[22:46],lw=2,fmt='o', color='black')
plt.errorbar(res[0:9],bestSs2[0:9],yerr=BootaggbestSs2err[0:9],lw=2,fmt='o', c=ReddishPurple,
             markeredgecolor=ReddishPurple)
plt.errorbar(res[9:22],bestSs2[9:22],yerr=BootaggbestSs2err[9:22],lw=2,fmt='o', c=Green,
             markeredgecolor=Green)
plt.errorbar(res[46:],bestSs2[46:],yerr=BootaggbestSs2err[46:],lw=2,fmt='o',color=Orange,
             markeredgecolor=Orange)
plt.text(2.5,0.90,"(e)",fontsize=14)

#plot tauS
xmin=0.0
xmax=60.0
ymin=0.0
ymax=5
xdel=xmax-xmin
ydel=ymax-ymin
arat=xdel/ydel*0.618

plt.subplot(3,2,6,aspect=arat)
plt.xlabel(r'Residue',fontsize='14')
plt.ylabel(r'$\tau_s$ (ns)',fontsize='14')
#plt.xlabel(r'Residue',fontsize='18')
plt.xlim(xmin,xmax)
plt.ylim(ymin,ymax)

plt.errorbar(res[22:46],bestTs[22:46],yerr=BootaggbestTserr[22:46],lw=2,fmt='o', color='black')
plt.errorbar(res[0:9],bestTs[0:9],yerr=BootaggbestTserr[0:9],lw=2,fmt='o', c=ReddishPurple,
             markeredgecolor=ReddishPurple)
plt.errorbar(res[9:22],bestTs[9:22],yerr=BootaggbestTserr[9:22],lw=2,fmt='o', c=Green,
             markeredgecolor=Green)
plt.errorbar(res[46:],bestTs[46:],yerr=BootaggbestTserr[46:],lw=2,fmt='o',color=Orange,
             markeredgecolor=Orange)
plt.text(2.5,0.90*5/1.05,"(f)",fontsize=14)

plt.savefig('GCN4sdmMFBootbest.pdf',bbox_inches = 'tight',pad_inches = 0)
plt.savefig('GCN4sdmMFBootbest.png',dpi=300,bbox_inches = 'tight',pad_inches = 0)


plt.show()

# %% [code]
#Accumulate bagging weights and compare to AICc weights

print('AICc versus Bagging Weights')

AICcAll = np.zeros([len(res),5])
AICWeights = np.zeros([len(res),5])
bagWeights = np.zeros([len(res),5])


print('Residue\tM1\tM2\tM3\tM4\tM5')

for n,val in enumerate(res):
    temp0 = AggAICc[n,:,0]
    
    temp = temp0 - min(temp0)
    temps = np.sum(np.exp(-temp))
    temp = np.exp(-temp)/temps
    
    if model2Agg[n,2,0] < Tfcut:
        AICWeights[n,:] = np.insert(temp,2,0.0)
        AICcAll[n,:] = np.insert(temp0,2,0.0)
    else:
        AICWeights[n,:] = np.insert(temp,1,0.0)
        AICcAll[n,:] = np.insert(temp0,1,0.0)
    
    m1AIC = AggAICc[n,0,:]
    m2AIC = AggAICc[n,1,:]
    m3AIC = AggAICc[n,2,:]
    m4AIC = AggAICc[n,3,:]
    AICtemp = np.stack((m1AIC,m2AIC,m3AIC,m4AIC))

    for i in range(Nboot):
        best = np.int(np.argsort(AICtemp[:,i])[0])
        if best == 0:
            bagWeights[n,0] = bagWeights[n,0] + 1
        if best == 1:
            if model2Agg[n,2,i] < Tfcut:
                bagWeights[n,1] = bagWeights[n,1] + 1
            else:
                bagWeights[n,2] = bagWeights[n,2] + 1
        if best == 2:
            bagWeights[n,3] = bagWeights[n,3] + 1
        if best == 3:
            bagWeights[n,4] = bagWeights[n,4] + 1

    bagWeights[n,:] = bagWeights[n,:]/Nboot
     
    print('{0:5.3f}\t{1:5.3f}\t{2:5.3f}\t{3:5.3f}\t{4:5.3f}\t{5:5.3f}'.
              format(val,AICWeights[n,0],AICWeights[n,1],AICWeights[n,2],AICWeights[n,3],AICWeights[n,4]))
    print('{0:5.3f}\t{1:5.3f}\t{2:5.3f}\t{3:5.3f}\t{4:5.3f}\t{5:5.3f}\n'.
              format(val,bagWeights[n,0],bagWeights[n,1],bagWeights[n,2],bagWeights[n,3],bagWeights[n,4]))

# %% [code]
#Calculate bagged model-free parameters

trim = 0.05
ilo = np.int(Nboot*trim)
ihi = np.int(Nboot*(1-trim))

bootYall = np.zeros([Nboot,12])

bagModel = np.zeros([len(res),6])
bagModelTrim = np.zeros([len(res),6])
bagError = np.zeros([len(res),6])
bagErrorTrim = np.zeros([len(res),6])
bagSmoothError = np.zeros([len(res),6])
bagSmoothErrorTrim = np.zeros([len(res),6])

bagtemp = np.zeros([Nboot,6])
bagCov = np.zeros(12)
Ybar = np.zeros(12)
bagCovTrim = np.zeros(12)
YbarTrim = np.zeros(12)

temps2 = np.array([])

print('Bagging Model Results')
print('\nResidue\ttm\t\t\tS2\t\tSf2\t\tSs2\t\ttf\t\tts')

#Create Y matrix
i = -1
for nj0 in range(0,Nreplace):
    for njwn in range(0,Nreplace):
        for njwh in range(0,Nreplace):
            i += 1
            bootYall[i,:] = np.concatenate((bootY[nj0,:],bootY[njwn,:],bootY[njwh,:]))

for i in range(0,12):
    Ybar[i] = np.mean(bootYall[:,i])

for n,val in enumerate(res):
    m1AIC = AggAICc[n,0,:]
    m2AIC = AggAICc[n,1,:]
    m3AIC = AggAICc[n,2,:]
    m4AIC = AggAICc[n,3,:]
    AICtemp = np.stack((m1AIC,m2AIC,m3AIC,m4AIC))

    for i in range(Nboot):
        best = np.int(np.argsort(AICtemp[:,i])[0])
        
        if best == 0:
            bagtemp[i,0] = model1Agg[n,0,i]
            bagtemp[i,1] = model1Agg[n,1,i]
            bagtemp[i,2] = model1Agg[n,1,i]
            bagtemp[i,3] = 1
            bagtemp[i,4] = 0
            bagtemp[i,5] = 0
        elif best == 1:
            bagtemp[i,0] = model2Agg[n,0,i]
            bagtemp[i,1] = model2Agg[n,1,i]
            if model2Agg[n,2,i] < Tfcut:
                bagtemp[i,2] = model2Agg[n,1,i]
                bagtemp[i,3] = 1.0 
                bagtemp[i,4] = model2Agg[n,2,i]
                bagtemp[i,5] = 0
            else:
                bagtemp[i,2] = 1.0 
                bagtemp[i,3] = model2Agg[n,1,i]
                bagtemp[i,4] = 0.0
                bagtemp[i,5]= model2Agg[n,2,i]
                
        elif best == 2:
            bagtemp[i,0] = model3Agg[n,0,i]
            bagtemp[i,1] = model3Agg[n,1,i]*model3Agg[n,2,i]
            bagtemp[i,2] = model3Agg[n,1,i]
            bagtemp[i,3] = model3Agg[n,2,i]
            bagtemp[i,4] = 0.0
            bagtemp[i,5] = model3Agg[n,3,i]
           
        else:
            bagtemp[i,0] = model4Agg[n,0,i]
            bagtemp[i,1] = model4Agg[n,1,i]*model4Agg[n,2,i]
            bagtemp[i,2] = model4Agg[n,1,i]
            bagtemp[i,3] = model4Agg[n,2,i]
            bagtemp[i,4] = model4Agg[n,3,i]
            bagtemp[i,5] = model4Agg[n,3,i] + model4Agg[n,4,i]
        
    for i in range(0,6):
        tmp = bagtemp[:,i]
        bagModel[n,i] = np.mean(tmp)
        bagError[n,i] = np.std(tmp)
        
        tmpsort = np.argsort(tmp)
        bagModelTrim[n,i] = np.mean(tmp[tmpsort[ilo:ihi]])
        bagErrorTrim[n,i] = np.std(tmp[tmpsort[ilo:ihi]])
        
        for j in range(0,12):
            bagCov[j] = np.mean(bootYall[:,j]*bagtemp[:,i]) - Ybar[j]*bagModel[n,i]
            tmpY = bootYall[tmpsort[ilo:ihi],j]
            tmpYbar = np.mean(tmpY)
            bagCovTrim[j] = np.mean(tmpY*tmp[tmpsort[ilo:ihi]]) - tmpYbar*bagModelTrim[n,i]
        bagSmoothError[n,i] = np.sqrt(np.sum(bagCov**2))
        bagSmoothErrorTrim[n,i] = np.sqrt(np.sum(bagCovTrim**2))
    
    if n < 22 or n >= 46:
        bagError[n,0] = 0
        bagSmoothError[n,0] = 0
        
    print('{0:3d}  {1:5.3f} +/- {2:5.3f}  {3:5.3f} +/- {4:5.3f}  {5:5.3f} +/- {6:5.3f}  {7:5.3f} +/- {8:5.3f}  {9:5.3f} +/- {10:5.3f}  {11:5.3f} +/- {12:5.3f}'.
              format(np.int(val),bagModel[n,0],bagError[n,0],
                     bagModel[n,1],bagError[n,1],
                     bagModel[n,2],bagError[n,2],
                     bagModel[n,3],bagError[n,3],
                     bagModel[n,4],bagError[n,4],
                    bagModel[n,5],bagError[n,5]))
    print('{0:3d}  {1:5.3f} +/- {2:5.3f}  {3:5.3f} +/- {4:5.3f}  {5:5.3f} +/- {6:5.3f}  {7:5.3f} +/- {8:5.3f}  {9:5.3f} +/- {10:5.3f}  {11:5.3f} +/- {12:5.3f}'.
              format(np.int(val),bagModel[n,0],bagSmoothError[n,0],
                     bagModel[n,1],bagSmoothError[n,1],
                     bagModel[n,2],bagSmoothError[n,2],
                     bagModel[n,3],bagSmoothError[n,3],
                     bagModel[n,4],bagSmoothError[n,4],
                    bagModel[n,5],bagSmoothError[n,5]))
    print('{0:3d}  {1:5.3f} +/- {2:5.3f}  {3:5.3f} +/- {4:5.3f}  {5:5.3f} +/- {6:5.3f}  {7:5.3f} +/- {8:5.3f}  {9:5.3f} +/- {10:5.3f}  {11:5.3f} +/- {12:5.3f}\n'.
              format(np.int(val),bagModelTrim[n,0],bagSmoothErrorTrim[n,0],
                     bagModelTrim[n,1],bagSmoothErrorTrim[n,1],
                     bagModelTrim[n,2],bagSmoothErrorTrim[n,2],
                     bagModelTrim[n,3],bagSmoothErrorTrim[n,3],
                     bagModelTrim[n,4],bagSmoothErrorTrim[n,4],
                    bagModelTrim[n,5],bagSmoothErrorTrim[n,5]))
    

# %% [code]
# plot the smoothed bagged fitted parameters

print('Bootstrap aggregation with smoothed uncertainties')

fig=plt.figure(figsize=(24/2.54,22/2.54))

#Plot S2
xmin=0.0
xmax=60.0
ymin=0.0
ymax=1.05
xdel=xmax-xmin
ydel=ymax-ymin
arat=xdel/ydel*0.618

plt.subplot(3,2,1,aspect=arat)

plt.ylabel(r'$S^2$',fontsize='14')
#plt.xlabel(r'Residue',fontsize='18')
plt.xlim(xmin,xmax)
plt.ylim(ymin,ymax)

plt.errorbar(res[22:46],bagModel[22:46,1],yerr=bagSmoothError[22:46,1],lw=2,fmt='o', color='black')
plt.errorbar(res[0:9],bagModel[0:9,1],yerr=bagSmoothError[0:9,1],lw=2,fmt='o', c=ReddishPurple,
             markeredgecolor=ReddishPurple)
plt.errorbar(res[9:22],bagModel[9:22,1],yerr=bagSmoothError[9:22,1],lw=2,fmt='o', c=Green,
             markeredgecolor=Green)
plt.errorbar(res[46:],bagModel[46:,1],yerr=bagSmoothError[46:,1],lw=2,fmt='o',color=Orange,
             markeredgecolor=Orange)
plt.text(2.5,0.90,"(a)",fontsize=14)

#plot tauM
xmin=0.0
xmax=60.0
ymin=10.0
ymax=22.0
xdel=xmax-xmin
ydel=ymax-ymin
arat=xdel/ydel*0.618

plt.subplot(3,2,2,aspect=arat)
plt.ylabel(r'$\tau_m$ (ns)',fontsize='14')
plt.ylim((ymin,ymax))

plt.errorbar(res[22:46],bagModel[22:46,0],yerr=bagSmoothError[22:46,0],lw=2,fmt='o', color='black')
plt.errorbar(res[0:9],bagModel[0:9,0],yerr=bagSmoothError[0:9,0],lw=2,fmt='o', c=ReddishPurple,
             markeredgecolor=ReddishPurple)
plt.errorbar(res[9:22],bagModel[9:22,0],yerr=bagSmoothError[9:22,0],lw=2,fmt='o', c=Green,
             markeredgecolor=Green)
plt.errorbar(res[46:],bagModel[46:,0],yerr=bagSmoothError[46:,0],lw=2,fmt='o',color=Orange,
             markeredgecolor=Orange)
plt.text(2.5,0.90*12/1.05+10,"(b)",fontsize=14)

#Plot Sf2
xmin=0.0
xmax=60.0
ymin=0.0
ymax=1.05
xdel=xmax-xmin
ydel=ymax-ymin
arat=xdel/ydel*0.618
plt.subplot(3,2,3,aspect=arat)

plt.ylabel(r'$S_f^2$',fontsize='14')
#plt.xlabel(r'Residue',fontsize='18')
plt.xlim(xmin,xmax)
plt.ylim(ymin,ymax)

plt.errorbar(res[22:46],bagModel[22:46,2],yerr=bagSmoothError[22:46,2],lw=2,fmt='o', color='black')
plt.errorbar(res[0:9],bagModel[0:9,2],yerr=bagSmoothError[0:9,2],lw=2,fmt='o', c=ReddishPurple,
             markeredgecolor=ReddishPurple)
plt.errorbar(res[9:22],bagModel[9:22,2],yerr=bagSmoothError[9:22,2],lw=2,fmt='o', c=Green,
             markeredgecolor=Green)
plt.errorbar(res[46:],bagModel[46:,2],yerr=bagSmoothError[46:,2],lw=2,fmt='o',color=Orange,
             markeredgecolor=Orange)
plt.text(2.5,0.90,"(c)",fontsize=14)

#plot tauF
xmin=0.0
xmax=60.0
ymin=0.0
ymax=0.15
xdel=xmax-xmin
ydel=ymax-ymin
arat=xdel/ydel*0.618

plt.subplot(3,2,4,aspect=arat)
plt.ylabel(r'$\tau_f$ (ns)',fontsize='14')
plt.ylim((ymin,ymax))

plt.errorbar(res[22:46],bagModel[22:46,4],yerr=bagSmoothError[22:46,4],lw=2,fmt='o', color='black')
plt.errorbar(res[0:9],bagModel[0:9,4],yerr=bagSmoothError[0:9,4],lw=2,fmt='o', c=ReddishPurple,
             markeredgecolor=ReddishPurple)
plt.errorbar(res[9:22],bagModel[9:22,4],yerr=bagSmoothError[9:22,4],lw=2,fmt='o', c=Green,
             markeredgecolor=Green)
plt.errorbar(res[46:],bagModel[46:,4],yerr=bagSmoothError[46:,4],lw=2,fmt='o',color=Orange,
             markeredgecolor=Orange)
plt.text(2.5,0.90*0.15/1.05,"(d)",fontsize=14)

#Plot Ss2
xmin=0.0
xmax=60.0
ymin=0.0
ymax=1.05
xdel=xmax-xmin
ydel=ymax-ymin
arat=xdel/ydel*0.618
plt.subplot(3,2,5,aspect=arat)

plt.xlabel(r'Residue',fontsize='14')
plt.ylabel(r'$S_s^2$',fontsize='14')
#plt.xlabel(r'Residue',fontsize='18')
plt.xlim(xmin,xmax)
plt.ylim(ymin,ymax)

plt.errorbar(res[22:46],bagModel[22:46,3],yerr=bagSmoothError[22:46,3],lw=2,fmt='o', color='black')
plt.errorbar(res[0:9],bagModel[0:9,3],yerr=bagSmoothError[0:9,3],lw=2,fmt='o', c=ReddishPurple,
             markeredgecolor=ReddishPurple)
plt.errorbar(res[9:22],bagModel[9:22,3],yerr=bagSmoothError[9:22,3],lw=2,fmt='o', c=Green,
             markeredgecolor=Green)
plt.errorbar(res[46:],bagModel[46:,3],yerr=bagSmoothError[46:,3],lw=2,fmt='o',color=Orange,
             markeredgecolor=Orange)
plt.text(2.5,0.90,"(e)",fontsize=14)

#plot tauS
xmin=0.0
xmax=60.0
ymin=0.0
ymax=5
xdel=xmax-xmin
ydel=ymax-ymin
arat=xdel/ydel*0.618

plt.subplot(3,2,6,aspect=arat)
plt.xlabel(r'Residue',fontsize='14')
plt.ylabel(r'$\tau_s$ (ns)',fontsize='14')
#plt.xlabel(r'Residue',fontsize='18')
plt.xlim(xmin,xmax)
plt.ylim(ymin,ymax)

plt.errorbar(res[22:46],bagModel[22:46,5],yerr=bagSmoothError[22:46,5],lw=2,fmt='o', color='black')
plt.errorbar(res[0:9],bagModel[0:9,5],yerr=bagSmoothError[0:9,5],lw=2,fmt='o', c=ReddishPurple,
             markeredgecolor=ReddishPurple)
plt.errorbar(res[9:22],bagModel[9:22,5],yerr=bagSmoothError[9:22,5],lw=2,fmt='o', c=Green,
             markeredgecolor=Green)
plt.errorbar(res[46:],bagModel[46:,5],yerr=bagSmoothError[46:,5],lw=2,fmt='o',color=Orange,
             markeredgecolor=Orange)
plt.text(2.5,0.90*5/1.05,"(f)",fontsize=14)


plt.savefig('GCN4sdmMFAggSmooth.pdf',bbox_inches = 'tight',pad_inches = 0)
plt.savefig('GCN4sdmMFAggSmooth.png',dpi=300,bbox_inches = 'tight',pad_inches = 0)

plt.show()

# %% [code]
# Compare conventional and bagging results

print('Compare single model with bootstrap aggregation')

fig=plt.figure(figsize=(24/2.54,22/2.54))

#Plot S2
xmin=0.0
xmax=60.0
ymin=0.0
ymax=1.05
xdel=xmax-xmin
ydel=ymax-ymin
arat=xdel/ydel*0.618

plt.subplot(3,2,1,aspect=arat)

plt.ylabel(r'$S^2$',fontsize='14')
plt.title('Smoothed',fontsize='14')
#plt.xlabel(r'Residue',fontsize='18')
plt.xlim(xmin,xmax)
plt.ylim(ymin,ymax)

plt.errorbar(res[22:46],bagModel[22:46,1],yerr=bagSmoothError[22:46,1],lw=2,fmt='o', color='black')
plt.errorbar(res[0:9],bagModel[0:9,1],yerr=bagSmoothError[0:9,1],lw=2,fmt='o', c=ReddishPurple,
             markeredgecolor=ReddishPurple)
plt.errorbar(res[9:22],bagModel[9:22,1],yerr=bagSmoothError[9:22,1],lw=2,fmt='o', c=Green,
             markeredgecolor=Green)
plt.errorbar(res[46:],bagModel[46:,1],yerr=bagSmoothError[46:,1],lw=2,fmt='o',color=Orange,
             markeredgecolor=Orange)
plt.text(2.5,0.90,"(a)",fontsize=14)


plt.subplot(3,2,2,aspect=arat)

plt.title('Conventional',fontsize='14')
plt.xlim(xmin,xmax)
plt.ylim(ymin,ymax)

plt.errorbar(res[22:46],bestS2[22:46],yerr=BootaggbestS2err[22:46],lw=2,fmt='o', color='black')
plt.errorbar(res[0:9],bestS2[0:9],yerr=BootaggbestS2err[0:9],lw=2,fmt='o', c=ReddishPurple,
             markeredgecolor=ReddishPurple)
plt.errorbar(res[9:22],bestS2[9:22],yerr=BootaggbestS2err[9:22],lw=2,fmt='o', c=Green,
             markeredgecolor=Green)
plt.errorbar(res[46:],bestS2[46:],yerr=BootaggbestS2err[46:],lw=2,fmt='o',color=Orange,
             markeredgecolor=Orange)
plt.text(2.5,0.90,"(b)",fontsize=14)

#Plot Sf2
xmin=0.0
xmax=60.0
ymin=0.0
ymax=1.05
xdel=xmax-xmin
ydel=ymax-ymin
arat=xdel/ydel*0.618
plt.subplot(3,2,3,aspect=arat)

plt.ylabel(r'$S_f^2$',fontsize='14')
#plt.xlabel(r'Residue',fontsize='18')
plt.xlim(xmin,xmax)
plt.ylim(ymin,ymax)

plt.errorbar(res[22:46],bagModel[22:46,2],yerr=bagSmoothError[22:46,2],lw=2,fmt='o', color='black')
plt.errorbar(res[0:9],bagModel[0:9,2],yerr=bagSmoothError[0:9,2],lw=2,fmt='o', c=ReddishPurple,
             markeredgecolor=ReddishPurple)
plt.errorbar(res[9:22],bagModel[9:22,2],yerr=bagSmoothError[9:22,2],lw=2,fmt='o', c=Green,
             markeredgecolor=Green)
plt.errorbar(res[46:],bagModel[46:,2],yerr=bagSmoothError[46:,2],lw=2,fmt='o',color=Orange,
             markeredgecolor=Orange)
plt.text(2.5,0.90,"(c)",fontsize=14)


plt.subplot(3,2,4,aspect=arat)
plt.xlim(xmin,xmax)
plt.ylim(ymin,ymax)

plt.errorbar(res[22:46],bestSf2[22:46],yerr=BootaggbestSf2err[22:46],lw=2,fmt='o', color='black')
plt.errorbar(res[0:9],bestSf2[0:9],yerr=BootaggbestSf2err[0:9],lw=2,fmt='o', c=ReddishPurple,
             markeredgecolor=ReddishPurple)
plt.errorbar(res[9:22],bestSf2[9:22],yerr=BootaggbestSf2err[9:22],lw=2,fmt='o', c=Green,
             markeredgecolor=Green)
plt.errorbar(res[46:],bestSf2[46:],yerr=BootaggbestSf2err[46:],lw=2,fmt='o',color=Orange,
             markeredgecolor=Orange)
plt.text(2.5,0.90,"(d)",fontsize=14)

#Plot Ss2
xmin=0.0
xmax=60.0
ymin=0.0
ymax=1.05
xdel=xmax-xmin
ydel=ymax-ymin
arat=xdel/ydel*0.618
plt.subplot(3,2,5,aspect=arat)

plt.xlabel(r'Residue',fontsize='14')
plt.ylabel(r'$S_s^2$',fontsize='14')
#plt.xlabel(r'Residue',fontsize='18')
plt.xlim(xmin,xmax)
plt.ylim(ymin,ymax)

plt.errorbar(res[22:46],bagModel[22:46,3],yerr=bagSmoothError[22:46,3],lw=2,fmt='o', color='black')
plt.errorbar(res[0:9],bagModel[0:9,3],yerr=bagSmoothError[0:9,3],lw=2,fmt='o', c=ReddishPurple,
             markeredgecolor=ReddishPurple)
plt.errorbar(res[9:22],bagModel[9:22,3],yerr=bagSmoothError[9:22,3],lw=2,fmt='o', c=Green,
             markeredgecolor=Green)
plt.errorbar(res[46:],bagModel[46:,3],yerr=bagSmoothError[46:,3],lw=2,fmt='o',color=Orange,
             markeredgecolor=Orange)
plt.text(2.5,0.90,"(e)",fontsize=14)


plt.subplot(3,2,6,aspect=arat)
plt.xlabel(r'Residue',fontsize='14')
#plt.xlabel(r'Residue',fontsize='18')
plt.xlim(xmin,xmax)
plt.ylim(ymin,ymax)

plt.errorbar(res[22:46],bestSs2[22:46],yerr=BootaggbestSs2err[22:46],lw=2,fmt='o', color='black')
plt.errorbar(res[0:9],bestSs2[0:9],yerr=BootaggbestSs2err[0:9],lw=2,fmt='o', c=ReddishPurple,
             markeredgecolor=ReddishPurple)
plt.errorbar(res[9:22],bestSs2[9:22],yerr=BootaggbestSs2err[9:22],lw=2,fmt='o', c=Green,
             markeredgecolor=Green)
plt.errorbar(res[46:],bestSs2[46:],yerr=BootaggbestSs2err[46:],lw=2,fmt='o',color=Orange,
             markeredgecolor=Orange)
plt.text(2.5,0.90,"(f)",fontsize=14)


plt.savefig('GCN4S2comp.pdf',bbox_inches = 'tight',pad_inches = 0)
plt.savefig('GCN4S2comp.png',dpi=300,bbox_inches = 'tight',pad_inches = 0)


plt.show()

# %% [code]
# Compare conventional and bagging results

print('Compare single model with bootstrap aggregation')

fig=plt.figure(figsize=(24/2.54,22/2.54))


#plot tauM
xmin=0.0
xmax=60.0
ymin=10.0
ymax=22.0
xdel=xmax-xmin
ydel=ymax-ymin
arat=xdel/ydel*0.618

plt.subplot(3,2,1,aspect=arat)
plt.ylabel(r'$\tau_m$ (ns)',fontsize='14')
plt.title('Smoothed',fontsize='14')
plt.ylim((ymin,ymax))

plt.errorbar(res[22:46],bagModel[22:46,0],yerr=bagSmoothError[22:46,0],lw=2,fmt='o', color='black')
plt.errorbar(res[0:9],bagModel[0:9,0],yerr=bagSmoothError[0:9,0],lw=2,fmt='o', c=ReddishPurple,
             markeredgecolor=ReddishPurple)
plt.errorbar(res[9:22],bagModel[9:22,0],yerr=bagSmoothError[9:22,0],lw=2,fmt='o', c=Green,
             markeredgecolor=Green)
plt.errorbar(res[46:],bagModel[46:,0],yerr=bagSmoothError[46:,0],lw=2,fmt='o',color=Orange,
             markeredgecolor=Orange)
plt.text(2.5,0.90*12/1.05+10,"(a)",fontsize=14)

plt.subplot(3,2,2,aspect=arat)
plt.title('Conventional',fontsize='14')
plt.ylim((ymin,ymax))

plt.errorbar(res[22:46],bestTm[22:46],yerr=BootaggbestTmerr[22:46],lw=2,fmt='o', color='black')
plt.errorbar(res[0:9],bestTm[0:9],yerr=BootaggbestTmerr[0:9],lw=2,fmt='o', c=ReddishPurple,
             markeredgecolor=ReddishPurple)
plt.errorbar(res[9:22],bestTm[9:22],yerr=BootaggbestTmerr[9:22],lw=2,fmt='o', c=Green,
             markeredgecolor=Green)
plt.errorbar(res[46:],bestTm[46:],yerr=BootaggbestTmerr[46:],lw=2,fmt='o',color=Orange,
             markeredgecolor=Orange)
plt.text(2.5,0.90*12/1.05+10,"(b)",fontsize=14)

#plot tauF
xmin=0.0
xmax=60.0
ymin=0.0
ymax=0.15
xdel=xmax-xmin
ydel=ymax-ymin
arat=xdel/ydel*0.618

plt.subplot(3,2,3,aspect=arat)
plt.ylabel(r'$\tau_f$ (ns)',fontsize='14')
plt.ylim((ymin,ymax))

plt.errorbar(res[22:46],bagModel[22:46,4],yerr=bagSmoothError[22:46,4],lw=2,fmt='o', color='black')
plt.errorbar(res[0:9],bagModel[0:9,4],yerr=bagSmoothError[0:9,4],lw=2,fmt='o', c=ReddishPurple,
             markeredgecolor=ReddishPurple)
plt.errorbar(res[9:22],bagModel[9:22,4],yerr=bagSmoothError[9:22,4],lw=2,fmt='o', c=Green,
             markeredgecolor=Green)
plt.errorbar(res[46:],bagModel[46:,4],yerr=bagSmoothError[46:,4],lw=2,fmt='o',color=Orange,
             markeredgecolor=Orange)
plt.text(2.5,0.90*0.15/1.05,"(c)",fontsize=14)

plt.subplot(3,2,4,aspect=arat)
plt.ylim((ymin,ymax))

plt.errorbar(res[22:46],bestTf[22:46],yerr=BootaggbestTferr[22:46],lw=2,fmt='o', color='black')
plt.errorbar(res[0:9],bestTf[0:9],yerr=BootaggbestTferr[0:9],lw=2,fmt='o', c=ReddishPurple,
             markeredgecolor=ReddishPurple)
plt.errorbar(res[9:22],bestTf[9:22],yerr=BootaggbestTferr[9:22],lw=2,fmt='o', c=Green,
             markeredgecolor=Green)
plt.errorbar(res[46:],bestTf[46:],yerr=BootaggbestTferr[46:],lw=2,fmt='o',color=Orange,
             markeredgecolor=Orange)
plt.text(2.5,0.90*0.15/1.05,"(d)",fontsize=14)

#plot tauS
xmin=0.0
xmax=60.0
ymin=0.0
ymax=5
xdel=xmax-xmin
ydel=ymax-ymin
arat=xdel/ydel*0.618

plt.subplot(3,2,5,aspect=arat)
plt.xlabel(r'Residue',fontsize='14')
plt.ylabel(r'$\tau_s$ (ns)',fontsize='14')
#plt.xlabel(r'Residue',fontsize='18')
plt.xlim(xmin,xmax)
plt.ylim(ymin,ymax)

plt.errorbar(res[22:46],bagModel[22:46,5],yerr=bagSmoothError[22:46,5],lw=2,fmt='o', color='black')
plt.errorbar(res[0:9],bagModel[0:9,5],yerr=bagSmoothError[0:9,5],lw=2,fmt='o', c=ReddishPurple,
             markeredgecolor=ReddishPurple)
plt.errorbar(res[9:22],bagModel[9:22,5],yerr=bagSmoothError[9:22,5],lw=2,fmt='o', c=Green,
             markeredgecolor=Green)
plt.errorbar(res[46:],bagModel[46:,5],yerr=bagSmoothError[46:,5],lw=2,fmt='o',color=Orange,
             markeredgecolor=Orange)
plt.text(2.5,0.90*5/1.05,"(e)",fontsize=14)

plt.subplot(3,2,6,aspect=arat)
plt.xlabel(r'Residue',fontsize='14')
plt.xlim(xmin,xmax)
plt.ylim(ymin,ymax)

plt.errorbar(res[22:46],bestTs[22:46],yerr=BootaggbestTserr[22:46],lw=2,fmt='o', color='black')
plt.errorbar(res[0:9],bestTs[0:9],yerr=BootaggbestTserr[0:9],lw=2,fmt='o', c=ReddishPurple,
             markeredgecolor=ReddishPurple)
plt.errorbar(res[9:22],bestTs[9:22],yerr=BootaggbestTserr[9:22],lw=2,fmt='o', c=Green,
             markeredgecolor=Green)
plt.errorbar(res[46:],bestTs[46:],yerr=BootaggbestTserr[46:],lw=2,fmt='o',color=Orange,
             markeredgecolor=Orange)
plt.text(2.5,0.90*5/1.05,"(f)",fontsize=14)

plt.savefig('GCN4taucomp.pdf',bbox_inches = 'tight',pad_inches = 0)
plt.savefig('GCN4taucomp.png',dpi=300,bbox_inches = 'tight',pad_inches = 0)


plt.show()

# %% [code]
# plot the bagged fitted parameters with trimmed smoothing

print('Trimmed bootstrap aggregation with smoothed uncertainties')

fig=plt.figure(figsize=(9,8))

#Plot S2
xmin=0.0
xmax=60.0
ymin=0.0
ymax=1.05
xdel=xmax-xmin
ydel=ymax-ymin
arat=xdel/ydel*0.618

plt.subplot(3,2,1,aspect=arat)

plt.ylabel(r'$S^2$',fontsize='14')
#plt.xlabel(r'Residue',fontsize='18')
plt.xlim(xmin,xmax)
plt.ylim(ymin,ymax)

plt.errorbar(res[22:46],bagModelTrim[22:46,1],yerr=bagSmoothErrorTrim[22:46,1],lw=2,fmt='o', color='black')
plt.errorbar(res[0:9],bagModelTrim[0:9,1],yerr=bagSmoothErrorTrim[0:9,1],lw=2,fmt='o', c=ReddishPurple,
             markeredgecolor=ReddishPurple)
plt.errorbar(res[9:22],bagModelTrim[9:22,1],yerr=bagSmoothErrorTrim[9:22,1],lw=2,fmt='o', c=Green,
             markeredgecolor=Green)
plt.errorbar(res[46:],bagModelTrim[46:,1],yerr=bagSmoothErrorTrim[46:,1],lw=2,fmt='o',color=Orange,
             markeredgecolor=Orange)

#plot tauM
xmin=0.0
xmax=60.0
ymin=10.0
ymax=22.0
xdel=xmax-xmin
ydel=ymax-ymin
arat=xdel/ydel*0.618

plt.subplot(3,2,2,aspect=arat)
plt.ylabel(r'$\tau_m$ ns',fontsize='14')
plt.ylim((ymin,ymax))

plt.errorbar(res[22:46],bagModelTrim[22:46,0],yerr=bagSmoothErrorTrim[22:46,0],lw=2,fmt='o', color='black')
plt.errorbar(res[0:9],bagModelTrim[0:9,0],yerr=bagSmoothErrorTrim[0:9,0],lw=2,fmt='o', c=ReddishPurple,
             markeredgecolor=ReddishPurple)
plt.errorbar(res[9:22],bagModelTrim[9:22,0],yerr=bagSmoothErrorTrim[9:22,0],lw=2,fmt='o', c=Green,
             markeredgecolor=Green)
plt.errorbar(res[46:],bagModelTrim[46:,0],yerr=bagSmoothErrorTrim[46:,0],lw=2,fmt='o',color=Orange,
             markeredgecolor=Orange)

#Plot Sf2
xmin=0.0
xmax=60.0
ymin=0.0
ymax=1.05
xdel=xmax-xmin
ydel=ymax-ymin
arat=xdel/ydel*0.618
plt.subplot(3,2,3,aspect=arat)

plt.ylabel(r'$S_f^2$',fontsize='14')
#plt.xlabel(r'Residue',fontsize='18')
plt.xlim(xmin,xmax)
plt.ylim(ymin,ymax)

plt.errorbar(res[22:46],bagModelTrim[22:46,2],yerr=bagSmoothErrorTrim[22:46,2],lw=2,fmt='o', color='black')
plt.errorbar(res[0:9],bagModelTrim[0:9,2],yerr=bagSmoothErrorTrim[0:9,2],lw=2,fmt='o', c=ReddishPurple,
             markeredgecolor=ReddishPurple)
plt.errorbar(res[9:22],bagModelTrim[9:22,2],yerr=bagSmoothErrorTrim[9:22,2],lw=2,fmt='o', c=Green,
             markeredgecolor=Green)
plt.errorbar(res[46:],bagModelTrim[46:,2],yerr=bagSmoothErrorTrim[46:,2],lw=2,fmt='o',color=Orange,
             markeredgecolor=Orange)

#plot tauF
xmin=0.0
xmax=60.0
ymin=0.0
ymax=0.15
xdel=xmax-xmin
ydel=ymax-ymin
arat=xdel/ydel*0.618

plt.subplot(3,2,4,aspect=arat)
plt.ylabel(r'$\tau_f$ ns',fontsize='14')
plt.ylim((ymin,ymax))

plt.errorbar(res[22:46],bagModelTrim[22:46,4],yerr=bagSmoothErrorTrim[22:46,4],lw=2,fmt='o', color='black')
plt.errorbar(res[0:9],bagModelTrim[0:9,4],yerr=bagSmoothErrorTrim[0:9,4],lw=2,fmt='o', c=ReddishPurple,
             markeredgecolor=ReddishPurple)
plt.errorbar(res[9:22],bagModelTrim[9:22,4],yerr=bagSmoothErrorTrim[9:22,4],lw=2,fmt='o', c=Green,
             markeredgecolor=Green)
plt.errorbar(res[46:],bagModelTrim[46:,4],yerr=bagSmoothErrorTrim[46:,4],lw=2,fmt='o',color=Orange,
             markeredgecolor=Orange)

#Plot Ss2
xmin=0.0
xmax=60.0
ymin=0.0
ymax=1.05
xdel=xmax-xmin
ydel=ymax-ymin
arat=xdel/ydel*0.618
plt.subplot(3,2,5,aspect=arat)

plt.xlabel(r'Residue',fontsize='14')
plt.ylabel(r'$S_s^2$',fontsize='14')
#plt.xlabel(r'Residue',fontsize='18')
plt.xlim(xmin,xmax)
plt.ylim(ymin,ymax)

plt.errorbar(res[22:46],bagModelTrim[22:46,3],yerr=bagSmoothErrorTrim[22:46,3],lw=2,fmt='o', color='black')
plt.errorbar(res[0:9],bagModelTrim[0:9,3],yerr=bagSmoothErrorTrim[0:9,3],lw=2,fmt='o', c=ReddishPurple,
             markeredgecolor=ReddishPurple)
plt.errorbar(res[9:22],bagModelTrim[9:22,3],yerr=bagSmoothErrorTrim[9:22,3],lw=2,fmt='o', c=Green,
             markeredgecolor=Green)
plt.errorbar(res[46:],bagModelTrim[46:,3],yerr=bagSmoothErrorTrim[46:,3],lw=2,fmt='o',color=Orange,
             markeredgecolor=Orange)
#plot tauS
xmin=0.0
xmax=60.0
ymin=0.0
ymax=3
xdel=xmax-xmin
ydel=ymax-ymin
arat=xdel/ydel*0.618

plt.subplot(3,2,6,aspect=arat)
plt.xlabel(r'Residue',fontsize='14')
plt.ylabel(r'$\tau_s$ ns',fontsize='14')
#plt.xlabel(r'Residue',fontsize='18')
plt.xlim(xmin,xmax)
plt.ylim(ymin,ymax)

plt.errorbar(res[22:46],bagModelTrim[22:46,5],yerr=bagSmoothErrorTrim[22:46,5],lw=2,fmt='o', color='black')
plt.errorbar(res[0:9],bagModelTrim[0:9,5],yerr=bagSmoothErrorTrim[0:9,5],lw=2,fmt='o', c=ReddishPurple,
             markeredgecolor=ReddishPurple)
plt.errorbar(res[9:22],bagModelTrim[9:22,5],yerr=bagSmoothErrorTrim[9:22,5],lw=2,fmt='o', c=Green,
             markeredgecolor=Green)
plt.errorbar(res[46:],bagModelTrim[46:,5],yerr=bagSmoothErrorTrim[46:,5],lw=2,fmt='o',color=Orange,
             markeredgecolor=Orange)


#plt.savefig('GCN4sdmMFAggSmoothTrim.pdf',bbox_inches = 'tight',pad_inches = 0)

plt.show()

# %% [code]

print('Bootstrap aggregation with unsmoothed uncertainties')
fig=plt.figure(figsize=(9,8))

#Plot S2
xmin=0.0
xmax=60.0
ymin=0.0
ymax=1.05
xdel=xmax-xmin
ydel=ymax-ymin
arat=xdel/ydel*0.618

plt.subplot(3,2,1,aspect=arat)

plt.ylabel(r'$S^2$',fontsize='18')
#plt.xlabel(r'Residue',fontsize='18')
plt.xlim(xmin,xmax)
plt.ylim(ymin,ymax)

plt.errorbar(res[22:46],bagModel[22:46,1],yerr=bagError[22:46,1],lw=2,fmt='o', color='black')
plt.errorbar(res[0:9],bagModel[0:9,1],yerr=bagError[0:9,1],lw=2,fmt='o', c=ReddishPurple,
             markeredgecolor=ReddishPurple)
plt.errorbar(res[9:22],bagModel[9:22,1],yerr=bagError[9:22,1],lw=2,fmt='o', c=Green,
             markeredgecolor=Green)
plt.errorbar(res[46:],bagModel[46:,1],yerr=bagError[46:,1],lw=2,fmt='o',color=Orange,
             markeredgecolor=Orange)

#plot tauM
xmin=0.0
xmax=60.0
ymin=10.0
ymax=22.0
xdel=xmax-xmin
ydel=ymax-ymin
arat=xdel/ydel*0.618

plt.subplot(3,2,2,aspect=arat)
plt.ylabel(r'$\tau_m$ ns',fontsize='18')
plt.ylim((ymin,ymax))

plt.errorbar(res[22:46],bagModel[22:46,0],yerr=bagError[22:46,0],lw=2,fmt='o', color='black')
plt.errorbar(res[0:9],bagModel[0:9,0],yerr=bagError[0:9,0],lw=2,fmt='o', c=ReddishPurple,
             markeredgecolor=ReddishPurple)
plt.errorbar(res[9:22],bagModel[9:22,0],yerr=bagError[9:22,0],lw=2,fmt='o', c=Green,
             markeredgecolor=Green)
plt.errorbar(res[46:],bagModel[46:,0],yerr=bagError[46:,0],lw=2,fmt='o',color=Orange,
             markeredgecolor=Orange)

#Plot Sf2
xmin=0.0
xmax=60.0
ymin=0.0
ymax=1.05
xdel=xmax-xmin
ydel=ymax-ymin
arat=xdel/ydel*0.618
plt.subplot(3,2,3,aspect=arat)

plt.ylabel(r'$S_f^2$',fontsize='18')
#plt.xlabel(r'Residue',fontsize='18')
plt.xlim(xmin,xmax)
plt.ylim(ymin,ymax)

plt.errorbar(res[22:46],bagModel[22:46,2],yerr=bagError[22:46,2],lw=2,fmt='o', color='black')
plt.errorbar(res[0:9],bagModel[0:9,2],yerr=bagError[0:9,2],lw=2,fmt='o', c=ReddishPurple,
             markeredgecolor=ReddishPurple)
plt.errorbar(res[9:22],bagModel[9:22,2],yerr=bagError[9:22,2],lw=2,fmt='o', c=Green,
             markeredgecolor=Green)
plt.errorbar(res[46:],bagModel[46:,2],yerr=bagError[46:,2],lw=2,fmt='o',color=Orange,
             markeredgecolor=Orange)

#plot tauF
xmin=0.0
xmax=60.0
ymin=0.0
ymax=0.15
xdel=xmax-xmin
ydel=ymax-ymin
arat=xdel/ydel*0.618

plt.subplot(3,2,4,aspect=arat)
plt.ylabel(r'$\tau_f$ ns',fontsize='18')
plt.ylim((ymin,ymax))

plt.errorbar(res[22:46],bagModel[22:46,4],yerr=bagError[22:46,4],lw=2,fmt='o', color='black')
plt.errorbar(res[0:9],bagModel[0:9,4],yerr=bagError[0:9,4],lw=2,fmt='o', c=ReddishPurple,
             markeredgecolor=ReddishPurple)
plt.errorbar(res[9:22],bagModel[9:22,4],yerr=bagError[9:22,4],lw=2,fmt='o', c=Green,
             markeredgecolor=Green)
plt.errorbar(res[46:],bagModel[46:,4],yerr=bagError[46:,4],lw=2,fmt='o',color=Orange,
             markeredgecolor=Orange)

#Plot Ss2
xmin=0.0
xmax=60.0
ymin=0.0
ymax=1.05
xdel=xmax-xmin
ydel=ymax-ymin
arat=xdel/ydel*0.618
plt.subplot(3,2,5,aspect=arat)

plt.xlabel(r'Residue',fontsize='18')
plt.ylabel(r'$S_s^2$',fontsize='18')
#plt.xlabel(r'Residue',fontsize='18')
plt.xlim(xmin,xmax)
plt.ylim(ymin,ymax)

plt.errorbar(res[22:46],bagModel[22:46,3],yerr=bagError[22:46,3],lw=2,fmt='o', color='black')
plt.errorbar(res[0:9],bagModel[0:9,3],yerr=bagError[0:9,3],lw=2,fmt='o', c=ReddishPurple,
             markeredgecolor=ReddishPurple)
plt.errorbar(res[9:22],bagModel[9:22,3],yerr=bagError[9:22,3],lw=2,fmt='o', c=Green,
             markeredgecolor=Green)
plt.errorbar(res[46:],bagModel[46:,3],yerr=bagError[46:,3],lw=2,fmt='o',color=Orange,
             markeredgecolor=Orange)
#plot tauS
xmin=0.0
xmax=60.0
ymin=0.0
ymax=3
xdel=xmax-xmin
ydel=ymax-ymin
arat=xdel/ydel*0.618

plt.subplot(3,2,6,aspect=arat)
plt.xlabel(r'Residue',fontsize='18')
plt.ylabel(r'$\tau_s$ ns',fontsize='18')
#plt.xlabel(r'Residue',fontsize='18')
plt.xlim(xmin,xmax)
plt.ylim(ymin,ymax)

plt.errorbar(res[22:46],bagModel[22:46,5],yerr=bagError[22:46,5],lw=2,fmt='o', color='black')
plt.errorbar(res[0:9],bagModel[0:9,5],yerr=bagError[0:9,5],lw=2,fmt='o', c=ReddishPurple,
             markeredgecolor=ReddishPurple)
plt.errorbar(res[9:22],bagModel[9:22,5],yerr=bagError[9:22,5],lw=2,fmt='o', c=Green,
             markeredgecolor=Green)
plt.errorbar(res[46:],bagModel[46:,5],yerr=bagError[46:,5],lw=2,fmt='o',color=Orange,
             markeredgecolor=Orange)


#plt.savefig('GCN4sdmMFAggUnsmooth.pdf')


plt.show()

# %% [code]
print('Comparison of Monte Carlo and Boostrap errors for single model')

fig=plt.figure(figsize=(12,13))

print(np.mean(bestS2err),np.mean(BootaggbestS2err))
print(np.mean(bestSf2err),np.mean(BootaggbestSf2err))
print(np.mean(bestSs2err),np.mean(BootaggbestSs2err))
print(np.mean(bestTmerr),np.mean(BootaggbestTmerr))
print(np.mean(bestTferr),np.mean(BootaggbestTferr))
print(np.mean(bestTserr),np.mean(BootaggbestTserr))

plt.subplot(3,2,1)
xmax = 0.06
plt.plot(bestS2err,BootaggbestS2err,lw=0,marker="o",color='black')
plt.plot(np.array([0,xmax]),np.array([0,xmax]),color='black')
plt.xlabel(r'$\hat{\sigma}(S^2)$',fontsize=14)
plt.ylabel(r'$\hat{\sigma}^*(S^2)$',fontsize=14)
plt.xlim(0,xmax)
plt.ylim(0,xmax)

plt.subplot(3,2,3)
xmax = 0.06
plt.plot(bestSf2err,BootaggbestSf2err,lw=0,marker="o",color='black')
plt.plot(np.array([0,xmax]),np.array([0,xmax]),color='black')
plt.xlabel(r'$\hat{\sigma}(S_f^2)$',fontsize=14)
plt.ylabel(r'$\hat{\sigma}^*(S_f^2)$',fontsize=14)
plt.xlim(0,xmax)
plt.ylim(0,xmax)

plt.subplot(3,2,5)
xmax = 0.06
plt.plot(bestSs2err,BootaggbestSs2err,lw=0,marker="o",color='black')
plt.plot(np.array([0,xmax]),np.array([0,xmax]),color='black')
plt.xlabel(r'$\hat{\sigma}(S_s^2)$',fontsize=14)
plt.ylabel(r'$\hat{\sigma}^*(S_s^2)$',fontsize=14)
plt.xlim(0,xmax)
plt.ylim(0,xmax)


plt.subplot(3,2,2)
xmax=0.8
plt.plot(bestTmerr,BootaggbestTmerr,lw=0,marker="o",color='black')
plt.plot(np.array([0,xmax]),np.array([0,xmax]),color='black')
plt.xlabel(r'$\hat{\sigma}(\tau_m)$',fontsize=14)
plt.ylabel(r'$\hat{\sigma}^*(\tau_m)$',fontsize=14)
plt.xlim(0,xmax)
plt.ylim(0,xmax)

plt.subplot(3,2,4)
xmax= 0.06
plt.plot(bestTferr,BootaggbestTferr,lw=0,marker="o",color='black')
plt.plot(np.array([0,xmax]),np.array([0,xmax]),color='black')
plt.xlabel(r'$\hat{\sigma}(\tau_f)$',fontsize=14)
plt.ylabel(r'$\hat{\sigma}^*(\tau_f)$',fontsize=14)
plt.xlim(0,xmax)
plt.ylim(0,xmax)

plt.subplot(3,2,6)
xmax=2.0
plt.plot(bestTserr,BootaggbestTserr,lw=0,marker="o",color='black')
plt.plot(np.array([0,xmax]),np.array([0,xmax]),color='black')
plt.xlabel(r'$\hat{\sigma}(\tau_s)$',fontsize=14)
plt.ylabel(r'$\hat{\sigma}^*(\tau_s)$',fontsize=14)
#plt.xlim(0,xmax)
#plt.ylim(0,xmax)

plt.show()

# %% [code]
print('Comparison of Monte Carlo and smoothed boostrap errors for single model')

fig=plt.figure(figsize=(12,13))

print(np.mean(bestS2err),np.mean(bagSmoothError[:,1]))
print(np.mean(bestSf2err),np.mean(bagSmoothError[:,2]))
print(np.mean(bestSs2err),np.mean(bagSmoothError[:,3]))
print(np.mean(bestTmerr),np.mean(bagSmoothError[:,0]))
print(np.mean(bestTferr),np.mean(bagSmoothError[:,4]))
print(np.mean(bestTserr),np.mean(bagSmoothError[:,5]))


plt.subplot(3,2,1)
xmax = 0.06
plt.plot(bestS2err,bagSmoothError[:,1],lw=0,marker="o",color='black')
plt.plot(np.array([0,xmax]),np.array([0,xmax]),color='black')
plt.xlabel(r'$\hat{\sigma}(S^2)$',fontsize=14)
plt.ylabel(r'$\tilde{\sigma}(S^2)$',fontsize=14)
plt.xlim(0,xmax)
plt.ylim(0,xmax)

plt.subplot(3,2,3)
xmax = 0.06
plt.plot(bestSf2err,bagSmoothError[:,2],lw=0,marker="o",color='black')
plt.plot(np.array([0,xmax]),np.array([0,xmax]),color='black')
plt.xlabel(r'$\hat{\sigma}(S_f^2)$',fontsize=14)
plt.ylabel(r'$\tilde{\sigma}(S_f^2)$',fontsize=14)
plt.xlim(0,xmax)
plt.ylim(0,xmax)

plt.subplot(3,2,5)
xmax = 0.06
plt.plot(bestSs2err,bagSmoothError[:,3],lw=0,marker="o",color='black')
plt.plot(np.array([0,xmax]),np.array([0,xmax]),color='black')
plt.xlabel(r'$\hat{\sigma}(S_s^2)$',fontsize=14)
plt.ylabel(r'$\tilde{\sigma}(S_s^2)$',fontsize=14)
plt.xlim(0,xmax)
plt.ylim(0,xmax)


plt.subplot(3,2,2)
xmax=0.8
plt.plot(bestTmerr,bagSmoothError[:,0],lw=0,marker="o",color='black')
plt.plot(np.array([0,xmax]),np.array([0,xmax]),color='black')
plt.xlabel(r'$\hat{\sigma}(\tau_m)$',fontsize=14)
plt.ylabel(r'$\tilde{\sigma}(\tau_m)$',fontsize=14)
plt.xlim(0,xmax)
plt.ylim(0,xmax)

plt.subplot(3,2,4)
xmax= 0.06
plt.plot(bestTferr,bagSmoothError[:,4],lw=0,marker="o",color='black')
plt.plot(np.array([0,xmax]),np.array([0,xmax]),color='black')
plt.xlabel(r'$\hat{\sigma}(\tau_f)$',fontsize=14)
plt.ylabel(r'$\tilde{\sigma}(\tau_f)$',fontsize=14)
plt.xlim(0,xmax)
plt.ylim(0,xmax)

plt.subplot(3,2,6)
xmax=2.0
plt.plot(bestTserr,bagSmoothError[:,5],lw=0,marker="o",color='black')
plt.plot(np.array([0,xmax]),np.array([0,xmax]),color='black')
plt.xlabel(r'$\hat{\sigma}(\tau_s)$',fontsize=14)
plt.ylabel(r'$\tilde{\sigma}(\tau_s)$',fontsize=14)
plt.xlim(0,xmax)
plt.ylim(0,xmax)

plt.show()

# %% [code]
print('Comparison of smoothed and unsmoothed errors bootstrap aggregation')

fig=plt.figure(figsize=(12,13))

plt.subplot(3,2,1)
xmax = 0.16
plt.plot(bagSmoothError[:,1],bagError[:,1],lw=0,marker="o",color='black')
plt.plot(np.array([0,xmax]),np.array([0,xmax]),color='black')
plt.xlabel(r'$\hat{\sigma}(S^2)$',fontsize=14)
plt.ylabel(r'$\hat{\sigma}^u(S^2)$',fontsize=14)
plt.xlim(0,xmax)
plt.ylim(0,xmax)

plt.subplot(3,2,3)
xmax = 0.16
plt.plot(bagSmoothError[:,2],bagError[:,2],lw=0,marker="o",color='black')
plt.plot(np.array([0,xmax]),np.array([0,xmax]),color='black')
plt.xlabel(r'$\hat{\sigma}(S_f^2)$',fontsize=14)
plt.ylabel(r'$\hat{\sigma}_f^u(S^2)$',fontsize=14)
plt.xlim(0,xmax)
plt.ylim(0,xmax)

plt.subplot(3,2,5)
xmax = 0.16
plt.plot(bagSmoothError[:,3],bagError[:,3],lw=0,marker="o",color='black')
plt.plot(np.array([0,xmax]),np.array([0,xmax]),color='black')
plt.xlabel(r'$\hat{\sigma}(S_s^2)$',fontsize=14)
plt.ylabel(r'$\hat{\sigma}^u(S_s^2)$',fontsize=14)
plt.xlim(0,xmax)
plt.ylim(0,xmax)


plt.subplot(3,2,2)
xmax=1.6
plt.plot(bagSmoothError[:,0],bagError[:,0],lw=0,marker="o",color='black')
plt.plot(np.array([0,xmax]),np.array([0,xmax]),color='black')
plt.xlabel(r'$\hat{\sigma}(\tau_m)$',fontsize=14)
plt.ylabel(r'$\hat{\sigma}^u(\tau_m)$',fontsize=14)
plt.xlim(0,xmax)
plt.ylim(0,xmax)

plt.subplot(3,2,4)
xmax= 0.06
plt.plot(bagSmoothError[:,4],bagError[:,4],lw=0,marker="o",color='black')
plt.plot(np.array([0,xmax]),np.array([0,xmax]),color='black')
plt.xlabel(r'$\hat{\sigma}(\tau_f)$',fontsize=14)
plt.ylabel(r'$\hat{\sigma}^u(\tau_f)$',fontsize=14)
plt.xlim(0,xmax)
plt.ylim(0,xmax)

plt.subplot(3,2,6)
xmax=2.5
plt.plot(bagSmoothError[:,5],bagError[:,5],lw=0,marker="o",color='black')
plt.plot(np.array([0,xmax]),np.array([0,xmax]),color='black')
plt.xlabel(r'$\hat{\sigma}(\tau_s)$',fontsize=14)
plt.ylabel(r'$\hat{\sigma}^u(\tau_s)$',fontsize=14)
plt.xlim(0,xmax)
plt.ylim(0,xmax)

plt.show()

# %% [code]
# Example figure for paper

fig=plt.figure(figsize=(2*12/2.54,6/2.54))

xmax = 0.05
ymax = 0.05
plt.subplot(1,3,1,aspect=1*xmax/ymax)
plt.plot(bestS2err,BootaggbestS2err,lw=0,marker="o",color='black')
plt.plot(np.array([0,xmax]),np.array([0,xmax]),color='black')
plt.xlim(0,xmax)
plt.ylim(0,ymax)
plt.xlabel(r'$\hat{\sigma}(S^2)$',fontsize=14)
plt.ylabel(r'$\hat{\sigma}^*(S^2)$',fontsize=14)
plt.text(0.042,0.0025,'(a)',fontsize=14)

xmax = 0.05
ymax = 0.05
plt.subplot(1,3,2,aspect=1*xmax/ymax)
plt.plot(bestS2err,bagSmoothError[:,1],lw=0,marker="o",color='black')
plt.plot(np.array([0,xmax]),np.array([0,xmax]),color='black')
plt.xlim(0,xmax)
plt.ylim(0,ymax)
plt.xlabel(r'$\hat{\sigma}(S^2)$',fontsize=14)
plt.ylabel(r'$\tilde{\sigma}(S^2)$',fontsize=14)
plt.text(0.042,0.0025,'(b)',fontsize=14)

xmax = 0.05
ymax = 0.1
plt.subplot(1,3,3,aspect=1*xmax/ymax)
plt.plot(bagSmoothError[:,1],bagError[:,1],lw=0,marker="o",color='black')
plt.plot(np.array([0,xmax]),np.array([0,xmax]),color='black')
plt.xlim(0,xmax)
plt.ylim(0,ymax)
plt.xlabel(r'$\tilde{\sigma}(S^2)$',fontsize=14)
plt.ylabel(r'$\hat{\sigma}^u(S^2)$',fontsize=14)
plt.text(0.042,0.125*0.0025/0.05,'(c)',fontsize=14)


plt.savefig('GCN4S2errorcomp.pdf',bbox_inches = 'tight',pad_inches = 0)
plt.savefig('GCN4S2errorcomp.png',dpi=300,bbox_inches = 'tight',pad_inches = 0)


plt.show()

# %% [code]
#Compare bagging with model selection

fig=plt.figure(figsize=(2*12/2.54,36/2.54))

plt.subplot(3,2,1,aspect=1)

plt.errorbar(bestS2[22:46],bagModel[22:46,1],xerr=bestS2err[22:46],yerr=bagSmoothError[22:46,1],
             lw=2,fmt='o', color='black')
plt.errorbar(bestS2[0:9],bagModel[0:9,1],xerr=bestS2err[0:9],yerr=bagSmoothError[0:9,1],
             lw=2,fmt='o', color=ReddishPurple)
plt.errorbar(bestS2[9:22],bagModel[9:22,1],xerr=bestS2err[9:22],yerr=bagSmoothError[9:22,1],
             lw=2,fmt='o', color=Green)
plt.errorbar(bestS2[46:],bagModel[46:,1],xerr=bestS2err[46:],yerr=bagSmoothError[46:,1],
             lw=2,fmt='o', color=Orange)

plt.xlabel(r'$S^2(AIC)$ (ns)',fontsize='14')
plt.ylabel(r'$S^2(Bag)$ (ns)',fontsize='14')

xmax = 1.05
plt.plot(np.array([0,xmax]),np.array([0,xmax]),c='black')
plt.xlim(0,xmax)
plt.ylim(0,xmax)

plt.subplot(3,2,2,aspect=1)

plt.errorbar(bestTm[22:46],bagModel[22:46,0],xerr=bestTmerr[22:46],yerr=bagSmoothError[22:46,0],
             lw=2,fmt='o', color='black')

xmax = 20
plt.plot(np.array([15,xmax]),np.array([15,xmax]),c='black')
plt.xlim(15,xmax)
plt.ylim(15,xmax)

plt.xlabel(r'$\tau_m(AIC)$ (ns)',fontsize='14')
plt.ylabel(r'$\tau_m(Bag)$ (ns)',fontsize='14')

plt.subplot(3,2,3,aspect=1)

plt.errorbar(bestSf2[22:46],bagModel[22:46,2],xerr=bestSf2err[22:46],yerr=bagSmoothError[22:46,2],
             lw=2,fmt='o', color='black')
plt.errorbar(bestSf2[0:9],bagModel[0:9,2],xerr=bestSf2err[0:9],yerr=bagSmoothError[0:9,2],
             lw=2,fmt='o', color=ReddishPurple)
plt.errorbar(bestSf2[9:22],bagModel[9:22,2],xerr=bestSf2err[9:22],yerr=bagSmoothError[9:22,2],
             lw=2,fmt='o', color=Green)
plt.errorbar(bestSf2[46:],bagModel[46:,2],xerr=bestSf2err[46:],yerr=bagSmoothError[46:,2],
             lw=2,fmt='o', color=Orange)

xmax = 1.05
plt.plot(np.array([0,xmax]),np.array([0,xmax]),c='black')
plt.xlim(0,xmax)
plt.ylim(0,xmax)

plt.xlabel(r'$S_f^2(AIC)$ (ns)',fontsize='14')
plt.ylabel(r'$S_f^2(Bag)$ (ns)',fontsize='14')

plt.subplot(3,2,4,aspect=1)

plt.errorbar(bestTf[22:46],bagModel[22:46,4],xerr=bestTferr[22:46],yerr=bagSmoothError[22:46,4],
             lw=2,fmt='o', color='black')
plt.errorbar(bestTf[0:9],bagModel[0:9,4],xerr=bestTferr[0:9],yerr=bagSmoothError[0:9,4],
             lw=2,fmt='o', color=ReddishPurple)
plt.errorbar(bestTf[9:22],bagModel[9:22,4],xerr=bestTferr[9:22],yerr=bagSmoothError[9:22,4],
             lw=2,fmt='o', color=Green)
plt.errorbar(bestTf[46:],bagModel[46:,4],xerr=bestTferr[46:],yerr=bagSmoothError[46:,4],
             lw=2,fmt='o', color=Orange)

xmax = 0.125
plt.plot(np.array([0,xmax]),np.array([0,xmax]),c='black')
plt.xlim(0,xmax)
plt.ylim(0,xmax)

plt.xlabel(r'$\tau_f(AIC)$ (ns)',fontsize='14')
plt.ylabel(r'$\tau_f(Bag)$ (ns)',fontsize='14')

plt.subplot(3,2,5,aspect=1)

plt.errorbar(bestSs2[22:46],bagModel[22:46,3],xerr=bestSs2err[22:46],yerr=bagSmoothError[22:46,3],
             lw=2,fmt='o', color='black')
plt.errorbar(bestSs2[0:9],bagModel[0:9,3],xerr=bestSs2err[0:9],yerr=bagSmoothError[0:9,3],
             lw=2,fmt='o', color=ReddishPurple)
plt.errorbar(bestSs2[9:22],bagModel[9:22,3],xerr=bestSs2err[9:22],yerr=bagSmoothError[9:22,3],
             lw=2,fmt='o', color=Green)
plt.errorbar(bestSs2[46:],bagModel[46:,3],xerr=bestSs2err[46:],yerr=bagSmoothError[46:,3],
             lw=2,fmt='o', color=Orange)

xmax = 1.05
plt.plot(np.array([0,xmax]),np.array([0,xmax]),c='black')
plt.xlim(0,xmax)
plt.ylim(0,xmax)

plt.xlabel(r'$S_s^2(AIC)$ (ns)',fontsize='14')
plt.ylabel(r'$S_s^2(Bag)$ (ns)',fontsize='14')

plt.subplot(3,2,6,aspect=1)

plt.errorbar(bestTs[22:46],bagModel[22:46,5],xerr=bestTserr[22:46],yerr=bagSmoothError[22:46,5],
             lw=2,fmt='o', color='black')
plt.errorbar(bestTs[0:9],bagModel[0:9,5],xerr=bestTserr[0:9],yerr=bagSmoothError[0:9,5],
             lw=2,fmt='o', color=ReddishPurple)
plt.errorbar(bestTs[9:22],bagModel[9:22,5],xerr=bestTserr[9:22],yerr=bagSmoothError[9:22,5],
             lw=2,fmt='o', color=Green)
plt.errorbar(bestTs[46:],bagModel[46:,5],xerr=bestTserr[46:],yerr=bagSmoothError[46:,5],
             lw=2,fmt='o', color=Orange)

xmax = 5
plt.plot(np.array([0,xmax]),np.array([0,xmax]),c='black')
plt.xlim(0,xmax)
plt.ylim(0,xmax)

plt.xlabel(r'$\tau_s(AIC)$ (ns)',fontsize='14')
plt.ylabel(r'$\tau_s(Bag)$ (ns)',fontsize='14')

#plt.savefig('sdmMFAICvsBag.pdf')
plt.show()

# %% [code]
# Inspect some bootstrap parameters for typical residues

residue = 11
for i,vv in enumerate(res):
    if vv == residue:
        val = vv
        n = i
print('Residue',res[n])

modelTmtmp = np.array([])
modelS2tmp = np.array([])
modelSf2tmp = np.array([])
modelSs2tmp = np.array([])
modelTftmp = np.array([])
modelTstmp = np.array([])

m1AIC = AggAICc[n,0,:]
m2AIC = AggAICc[n,1,:]
m3AIC = AggAICc[n,2,:]
m4AIC = AggAICc[n,3,:]
AICtemp = np.stack((m1AIC,m2AIC,m3AIC,m4AIC))

for i in range(0,Nboot):
    best = np.int(np.argsort(AICtemp[:,i])[0])
        
    if best == 0:
        modelTmtmp = np.append(modelTmtmp,model1Agg[n,0,i])
        modelSf2tmp = np.append(modelSf2tmp,model1Agg[n,1,i])
        modelSs2tmp = np.append(modelSs2tmp,1.0)
        modelTftmp = np.append(modelTftmp,0)
        modelTstmp = np.append(modelTstmp,0) 
        
           
    elif best == 1:
        modelTmtmp = np.append(modelTmtmp,model2Agg[n,0,i])
        if model2Agg[n,2,i] < Tfcut:
            modelSf2tmp = np.append(modelSf2tmp,model2Agg[n,1,i])
            modelSs2tmp = np.append(modelSs2tmp,1.0)
            modelTftmp = np.append(modelTftmp,model2Agg[n,2,i])
            modelTstmp = np.append(modelTstmp,0)    
        else:
            modelSs2tmp = np.append(modelSs2tmp,model2Agg[n,1,i])
            modelSf2tmp = np.append(modelSf2tmp,1.0)
            modelTstmp = np.append(modelTstmp,model2Agg[n,2,i])
            modelTftmp = np.append(modelTftmp,0) 
        
    elif best == 2:
        modelTmtmp = np.append(modelTmtmp,model3Agg[n,0,i])
        modelSf2tmp = np.append(modelSf2tmp,model3Agg[n,1,i])
        modelSs2tmp = np.append(modelSs2tmp,model3Agg[n,2,i])
        modelTftmp = np.append(modelTftmp,0)
        modelTstmp = np.append(modelTstmp,model3Agg[n,3,i])
           
    elif best == 3:
        modelTmtmp = np.append(modelTmtmp,model4Agg[n,0,i])
        modelSf2tmp = np.append(modelSf2tmp,model4Agg[n,1,i])
        modelSs2tmp = np.append(modelSs2tmp,model4Agg[n,2,i])
        modelTftmp = np.append(modelTftmp,model4Agg[n,3,i])
        modelTstmp = np.append(modelTstmp,model4Agg[n,4,i])

modelS2tmp = modelSf2tmp*modelSs2tmp


print('\nCount Sf2=1:',np.sum(modelSf2tmp==1),'\t\tCount Sf2<1:',np.sum(modelSf2tmp != 1))
print('Count Ss2=1:',np.sum(modelSs2tmp==1),'\t\tCount Ss2=1:',np.sum(modelSs2tmp != 1))
print('Count tf=0:',np.sum(modelTftmp<=0),'\t\tCount tf>0:',np.sum(modelTftmp>0))
print('Count ts=0:',np.sum(modelTstmp<=0),'\t\tCount ts>0:',np.sum(modelTstmp>0))

fig, ((ax1), (ax3),(ax4)) = plt.subplots(3, 1, sharex=False,figsize=(0.655*8.3*2/2.54,26/2.54))
#fig.subplots_adjust(hspace=0.1,wspace=0.3,top=0.95,bottom=0.15)

ymax=1500
ax1.set_aspect(0.618/ymax)
ax1.hist(modelS2tmp,bins=np.linspace(0,1.1,200),color='black')
ax1.set_xlim(0,1.0)
ax1.set_ylim(0,ymax)
ax1.set_xlabel(r'$S^2$',fontsize=14)
ax1.set_ylabel('Count',fontsize=14)
ax1.text(0.03,0.90,"(a)",transform=ax1.transAxes,fontsize=14)

ymax=1500
ax3.set_aspect(0.618/ymax)
ax3.hist(modelSf2tmp,bins=np.linspace(0,1.1,200),color=ReddishPurple)
ax3.hist(modelSs2tmp,bins=np.linspace(0,1.1,200),color=Blue)
ax3.set_xlim(0,1.0)
ax3.set_ylim(0,ymax)
ax3.set_xlabel(r'$S_{f,s}^2$',fontsize=14)
ax3.set_ylabel('Count',fontsize=14)
ax3.text(0.03,0.90,"(b)",transform=ax3.transAxes,fontsize=14)

ymax = 1200
ax4.set_aspect(0.618*3/ymax)
ax4.hist(np.log10(modelTftmp[modelTftmp>0]),bins=np.linspace(-2.5,0.5,200),color=ReddishPurple)
ax4.hist(np.log10(modelTstmp[modelTstmp>0]),bins=np.linspace(-2.5,0.5,200),color=Blue)
ax4.axvline(np.log10(bestTs[n]),color=Orange)
ax4.set_xlim(-2.5,0.5)
ax4.set_ylim(0,ymax)
ax4.set_xlabel(r'$log_{10}(\tau_{f,s} /1 ns)$',fontsize=14)
ax4.set_ylabel('Count',fontsize=14)
ax4.text(0.03,0.90,"(c)",transform=ax4.transAxes,fontsize=14)

plt.savefig('BagDistRes11.pdf',bbox_inches = 'tight',pad_inches = 0)
plt.show()

# %% [code]
# Inspect some bootstrap parameters for model 1 and model 2 for typical residues

residue = 11
for i,vv in enumerate(res):
    if vv == residue:
        val = vv
        n = i
print('Residue',res[n])

modelTmtmp = np.array([])
modelS2tmp = np.array([])
modelSf2tmp = np.array([])
modelSs2tmp = np.array([])
modelTftmp = np.array([])
modelTstmp = np.array([])

m1AIC = AggAICc[n,0,:]
m2AIC = AggAICc[n,1,:]
m3AIC = AggAICc[n,2,:]
m4AIC = AggAICc[n,3,:]
AICtemp = np.stack((m1AIC,m2AIC,m3AIC,m4AIC))

for i in range(0,Nboot):
    best = np.int(np.argsort(AICtemp[:,i])[0])
        
    if best == 0:
        modelTmtmp = np.append(modelTmtmp,model1Agg[n,0,i])
        modelSf2tmp = np.append(modelSf2tmp,model1Agg[n,1,i])
        modelSs2tmp = np.append(modelSs2tmp,1.0)
        modelTftmp = np.append(modelTftmp,0)
        modelTstmp = np.append(modelTstmp,0) 
        
           
    elif best == 1:
        modelTmtmp = np.append(modelTmtmp,model2Agg[n,0,i])
        if model2Agg[n,2,i] < Tfcut:
            modelSf2tmp = np.append(modelSf2tmp,model2Agg[n,1,i])
            modelSs2tmp = np.append(modelSs2tmp,1.0)
            modelTftmp = np.append(modelTftmp,model2Agg[n,2,i])
            modelTstmp = np.append(modelTstmp,0)    
        else:
            modelSs2tmp = np.append(modelSs2tmp,model2Agg[n,1,i])
            modelSf2tmp = np.append(modelSf2tmp,1.0)
            modelTstmp = np.append(modelTstmp,model2Agg[n,2,i])
            modelTftmp = np.append(modelTftmp,0) 
        
    elif best == 2:
        modelTmtmp = np.append(modelTmtmp,model3Agg[n,0,i])
        modelSf2tmp = np.append(modelSf2tmp,model3Agg[n,1,i])
        modelSs2tmp = np.append(modelSs2tmp,model3Agg[n,2,i])
        modelTftmp = np.append(modelTftmp,0)
        modelTstmp = np.append(modelTstmp,model3Agg[n,3,i])
           
    elif best == 3:
        modelTmtmp = np.append(modelTmtmp,model4Agg[n,0,i])
        modelSf2tmp = np.append(modelSf2tmp,model4Agg[n,1,i])
        modelSs2tmp = np.append(modelSs2tmp,model4Agg[n,2,i])
        modelTftmp = np.append(modelTftmp,model4Agg[n,3,i])
        modelTstmp = np.append(modelTstmp,model4Agg[n,4,i])

modelS2tmp = modelSf2tmp*modelSs2tmp


print('\nCount Sf2=1:',np.sum(modelSf2tmp==1),'\t\tCount Sf2<1:',np.sum(modelSf2tmp != 1))
print('Count Ss2=1:',np.sum(modelSs2tmp==1),'\t\tCount Ss2=1:',np.sum(modelSs2tmp != 1))
print('Count tf=0:',np.sum(modelTftmp<=0),'\t\tCount tf>0:',np.sum(modelTftmp>0))
print('Count ts=0:',np.sum(modelTstmp<=0),'\t\tCount ts>0:',np.sum(modelTstmp>0))

fig, (ax1,ax3,ax4) = plt.subplots(1,3, sharex=False,figsize=(12*2/2.54,7/2.54))
#fig.subplots_adjust(hspace=0.1,wspace=0.3,top=0.95,bottom=0.15)

ymax=1500
ax1.set_aspect(1/ymax)
ax1.hist(modelS2tmp,bins=np.linspace(0,1.1,200),color='black')
ax1.set_xlim(0,1.0)
ax1.set_ylim(0,ymax)
ax1.set_xlabel(r'$S^2$',fontsize=14)
ax1.set_ylabel('Count',fontsize=14)
ax1.text(0.03,0.90,"(a)",transform=ax1.transAxes,fontsize=14)

ymax=1500
ax3.set_aspect(1/ymax)
ax3.hist(modelSf2tmp,bins=np.linspace(0,1.1,200),color=ReddishPurple)
ax3.hist(modelSs2tmp,bins=np.linspace(0,1.1,200),color=Blue)
ax3.set_xlim(0,1.0)
ax3.set_ylim(0,ymax)
ax3.set_xlabel(r'$S_{f,s}^2$',fontsize=14)
#ax3.set_ylabel('Count',fontsize=14)
ax3.text(0.03,0.90,"(b)",transform=ax3.transAxes,fontsize=14)

ymax = 1200
ax4.set_aspect(1*3/ymax)
ax4.hist(np.log10(modelTftmp[modelTftmp>0]),bins=np.linspace(-2.5,0.5,200),color=ReddishPurple)
ax4.hist(np.log10(modelTstmp[modelTstmp>0]),bins=np.linspace(-2.5,0.5,200),color=Blue)
ax4.axvline(np.log10(bestTs[n]),color=Orange)
ax4.set_xlim(-2.5,0.5)
ax4.set_ylim(0,ymax)
ax4.set_xlabel(r'$log_{10}(\tau_{f,s} /1 ns)$',fontsize=14)
#ax4.set_ylabel('Count',fontsize=14)
ax4.text(0.03,0.90,"(c)",transform=ax4.transAxes,fontsize=14)

plt.savefig('BagDistRes11h.pdf',bbox_inches = 'tight',pad_inches = 0)
plt.savefig('BagDistRes11h.png',dpi=300,bbox_inches = 'tight',pad_inches = 0)
plt.show()

# %% [code]
# Make individual residue graphs for eventual figures

residue = 11

figureps = "RNH_"+ str(residue) +".ps"

print ("Residue",int(residue))

for i,vv in enumerate(res):
    if vv == residue:
        val = vv
        n = i

#create data vector
tmpdata=np.concatenate([np.array([j0[n,1]]),jwn[n,0:8:2],j87wH[n,0:8:2]])
tmperr=np.concatenate([np.array([j0[n,2]]),jwn[n,1:8:2],j87wH[n,1:8:2]])

normJ = tmpdata[1:]/tmpdata[0]
normJerr = normJ*np.sqrt((tmperr[1:]/tmpdata[1:])**2 + (tmperr[0]/tmpdata[0])**2)

tmpmodel1 = Jmf1(xr,*model1[n,:])
tmpmodel2 = Jmf2(xr,*model2[n,:])
tmpmodel3 = Jmf3(xr,*model3[n,:])
tmpmodel4 = Jmf4(xr,*model4[n,:])

bagtmp = np.delete(bagModel[n,:],1)
tmpmodelB = Jmf4(xr,*bagtmp)

print('\n\tModel1\t\tModel2\t\tModel3\t\tModel4\t\tModel5')
print('{0}\t{1:5.3f}\t\t{2:5.3f}\t\t{3:5.3f}\t\t{4:5.3f}\t\t{5:5.3f}'.
              format('AICc',AICcAll[n,0],AICcAll[n,1],AICcAll[n,2],AICcAll[n,3],AICcAll[n,4]))
print('{0}\t{1:5.3f}\t\t{2:5.3f}\t\t{3:5.3f}\t\t{4:5.3f}\t\t{5:5.3f}'.
              format('AIC%',AICWeights[n,0],AICWeights[n,1],AICWeights[n,2],AICWeights[n,3],AICWeights[n,4]))
print('{0}\t{1:5.3f}\t\t{2:5.3f}\t\t{3:5.3f}\t\t{4:5.3f}\t\t{5:5.3f}\n'.
              format('Bag%',bagWeights[n,0],bagWeights[n,1],bagWeights[n,2],bagWeights[n,3],bagWeights[n,4]))

print('\nModel\ttm\t\tS2\t\tSf2\t\tSs2\t\t\ttf\t\tts')

print('1   {0:5.3f} +/- {1:5.3f}  {2:5.3f} +/- {3:5.3f}'.
              format(model1[n,0],model1Jerr[n,0],model1[n,1],model1Jerr[n,1]))

if model2[n,2] < 0.2:
    print('2   {0:5.3f} +/- {1:5.3f}  {2:5.3f} +/- {3:5.3f}\t\t\t\t      {4:5.3f} +/- {5:5.3f}'.
          format(model2[n,0],model2Jerr[n,0],model2[n,1],model2Jerr[n,1],model2[n,2],model2Jerr[n,2]))
else:
    print('3   {0:5.3f} +/- {1:5.3f}  {2:5.3f} +/- {3:5.3f}\t\t\t\t\t\t       {4:5.3f} +/- {5:5.3f}'.
          format(model2[n,0],model2Jerr[n,0],model2[n,1],model2Jerr[n,1],model2[n,2],model2Jerr[n,2]))

print('4   {0:5.3f} +/- {1:5.3f}  {2:5.3f} +/- {3:5.3f}  {4:5.3f} +/- {5:5.3f}  {6:5.3f} +/- {7:5.3f}\t\t       {8:5.3f} +/- {9:5.3f}'.
      format(model3[n,0],model3Jerr[n,0],model3[n,1]*model3[n,2],model3Jerr[n,4],
             model3[n,1],model3Jerr[n,1],model3[n,2],model3Jerr[n,2],model3[n,3],model3Jerr[n,3]))
        
print('5   {0:5.3f} +/- {1:5.3f}  {2:5.3f} +/- {3:5.3f}  {4:5.3f} +/- {5:5.3f}  {6:5.3f} +/- {7:5.3f} {8:5.3f} +/- {9:5.3f} {10:5.3f} +/- {11:5.3f}'.
      format(model4[n,0],model4Jerr[n,0],model4[n,1]*model4[n,2],model4Jerr[n,5],
             model4[n,1],model4Jerr[n,1],model4[n,2],model4Jerr[n,2],model4[n,3],model4Jerr[n,3],model4[n,4],model4Jerr[n,4]))
print('Bag {0:5.3f} +/- {1:5.3f}  {2:5.3f} +/- {3:5.3f}  {4:5.3f} +/- {5:5.3f}  {6:5.3f} +/- {7:5.3f} {8:5.3f} +/- {9:5.3f} {10:5.3f} +/- {11:5.3f}'.
      format(bagModel[n,0],bagSmoothError[n,0],bagModel[n,1],bagSmoothError[n,1],
             bagModel[n,2],bagSmoothError[n,2],bagModel[n,3],bagSmoothError[n,3],bagModel[n,4],bagSmoothError[n,4],bagModel[n,5],bagSmoothError[n,5]))
        
fig=plt.figure(figsize=(12*2/2.54,15/2.54))

ncols=2
nrows=2

xmaxA = 5.0
xminA = 0.0
ymaxA = 1
yminA = -3

xmaxB = 7.0
xminB = 2.0
ymaxB = 0.25

xmaxC = 0.1
ymaxC = 0.03

#model 1
plt.subplot(nrows,ncols,1,aspect=0.618*(xmaxA-xminA)/(ymaxA-yminA))

plt.ylabel(r'$log_{10}[J(\omega)/(1 ns)]$',fontsize=14)
        
plt.xlim(xminA,xmaxA)
plt.ylim(yminA,ymaxA)
plt.text(4.5,0.5,'(a)',fontsize=14)

plt.errorbar(allfields,np.log10(tmpdata),yerr=tmperr/tmpdata, fmt='o',color='black')
plt.plot(xr,np.log10(tmpmodel1),color="black",lw=2)
plt.plot(xr,np.log10(tmpmodelB),color=ReddishPurple,lw=2)

#model 2/3
plt.subplot(nrows,ncols,2,aspect=0.618*(xmaxA-xminA)/(ymaxA-yminA))
        
plt.xlim(xminA,xmaxA)
plt.ylim(yminA,ymaxA)
plt.text(4.5,0.5,'(b)',fontsize=14)

plt.errorbar(allfields,np.log10(tmpdata),yerr=tmperr/tmpdata, fmt='o',color='black')
plt.plot(xr,np.log10(tmpmodel2),color="black",lw=2)
plt.plot(xr,np.log10(tmpmodelB),color=ReddishPurple,lw=2)

#model 4
plt.subplot(nrows,ncols,3,aspect=0.618*(xmaxA-xminA)/(ymaxA-yminA))

plt.xlabel(r'$\omega$ (1/ns)',fontsize=14)
plt.ylabel(r'$log_{10}[J(\omega)/(1 ns)]$',fontsize=14)
plt.text(4.5,0.5,'(c)',fontsize=14)

plt.xlim(xminA,xmaxA)
plt.ylim(yminA,ymaxA)

plt.errorbar(allfields,np.log10(tmpdata),yerr=tmperr/tmpdata, fmt='o',color='black')
plt.plot(xr,np.log10(tmpmodel3),color="black",lw=2)
plt.plot(xr,np.log10(tmpmodelB),color=ReddishPurple,lw=2)

#model 5
plt.subplot(nrows,ncols,4,aspect=0.618*(xmaxA-xminA)/(ymaxA-yminA))

plt.xlabel(r'$\omega$ (1/ns)',fontsize=14)
plt.text(4.5,0.5,'(d)',fontsize=14)

plt.xlim(xminA,xmaxA)
plt.ylim(yminA,ymaxA)

plt.errorbar(allfields,np.log10(tmpdata),yerr=tmperr/tmpdata, fmt='o',color='black')
plt.plot(xr,np.log10(tmpmodel4),color="black",lw=2)
plt.plot(xr,np.log10(tmpmodelB),color=ReddishPurple,lw=2)

plt.savefig('BagFitRes11.pdf',bbox_inches = 'tight',pad_inches = 0)
plt.savefig('BagFitRes11.png',dpi=300,bbox_inches = 'tight',pad_inches = 0)

plt.show()


# %% [code]
# Inspect some bootstrap parameters for model 1 and model 2 for typical residues

residue = 26
for i,vv in enumerate(res):
    if vv == residue:
        val = vv
        n = i
print('Residue',res[n])

modelTmtmp = np.array([])
modelS2tmp = np.array([])
modelSf2tmp = np.array([])
modelSs2tmp = np.array([])
modelTftmp = np.array([])
modelTstmp = np.array([])

m1AIC = AggAICc[n,0,:]
m2AIC = AggAICc[n,1,:]
m3AIC = AggAICc[n,2,:]
m4AIC = AggAICc[n,3,:]
AICtemp = np.stack((m1AIC,m2AIC,m3AIC,m4AIC))

for i in range(0,Nboot):
    best = np.int(np.argsort(AICtemp[:,i])[0])
        
    if best == 0:
        modelTmtmp = np.append(modelTmtmp,model1Agg[n,0,i])
        modelSf2tmp = np.append(modelSf2tmp,model1Agg[n,1,i])
        modelSs2tmp = np.append(modelSs2tmp,1.0)
        modelTftmp = np.append(modelTftmp,0)
        modelTstmp = np.append(modelTstmp,0) 
        
           
    elif best == 1:
        modelTmtmp = np.append(modelTmtmp,model2Agg[n,0,i])
        if model2Agg[n,2,i] < Tfcut:
            modelSf2tmp = np.append(modelSf2tmp,model2Agg[n,1,i])
            modelSs2tmp = np.append(modelSs2tmp,1.0)
            modelTftmp = np.append(modelTftmp,model2Agg[n,2,i])
            modelTstmp = np.append(modelTstmp,0)    
        else:
            modelSs2tmp = np.append(modelSs2tmp,model2Agg[n,1,i])
            modelSf2tmp = np.append(modelSf2tmp,1.0)
            modelTstmp = np.append(modelTstmp,model2Agg[n,2,i])
            modelTftmp = np.append(modelTftmp,0) 
        
    elif best == 2:
        modelTmtmp = np.append(modelTmtmp,model3Agg[n,0,i])
        modelSf2tmp = np.append(modelSf2tmp,model3Agg[n,1,i])
        modelSs2tmp = np.append(modelSs2tmp,model3Agg[n,2,i])
        modelTftmp = np.append(modelTftmp,0)
        modelTstmp = np.append(modelTstmp,model3Agg[n,3,i])
           
    elif best == 3:
        modelTmtmp = np.append(modelTmtmp,model4Agg[n,0,i])
        modelSf2tmp = np.append(modelSf2tmp,model4Agg[n,1,i])
        modelSs2tmp = np.append(modelSs2tmp,model4Agg[n,2,i])
        modelTftmp = np.append(modelTftmp,model4Agg[n,3,i])
        modelTstmp = np.append(modelTstmp,model4Agg[n,4,i])

modelS2tmp = modelSf2tmp*modelSs2tmp


print('\nCount Sf2=1:',np.sum(modelSf2tmp==1),'\t\tCount Sf2<1:',np.sum(modelSf2tmp != 1))
print('Count Ss2=1:',np.sum(modelSs2tmp==1),'\t\tCount Ss2=1:',np.sum(modelSs2tmp != 1))
print('Count tf=0:',np.sum(modelTftmp<=0),'\t\tCount tf>0:',np.sum(modelTftmp>0))
print('Count ts=0:',np.sum(modelTstmp<=0),'\t\tCount ts>0:',np.sum(modelTstmp>0))

fig, ((ax1, ax2), (ax3,ax4)) = plt.subplots(2, 2, sharex=False,figsize=(12*2/2.54,17/2.54))
#fig.subplots_adjust(hspace=0.1,wspace=0.3,top=0.95,bottom=0.15)

ymax=600
ax1.set_aspect(0.618/ymax)
ax1.hist(modelS2tmp,bins=np.linspace(0,1.1,200),color='black')
ax1.set_xlim(0,1.0)
ax1.set_ylim(0,ymax)
ax1.set_xlabel(r'$S^2$',fontsize=14)
ax1.set_ylabel('Count',fontsize=14)
ax1.text(0.03,0.90,"(a)",transform=ax1.transAxes,fontsize=14)

ymax=500
ax2.set_aspect(0.618*0.5/ymax)
ax2.hist(np.log10(modelTmtmp),bins=np.linspace(1,1.5,200),color='black')
ax2.set_xlim(1.0,1.5)
ax2.set_ylim(0,ymax)
ax2.set_xlabel(r'$log_{10}(\tau_m /1 ns)$',fontsize=14)
ax2.text(0.03,0.90,"(b)",transform=ax2.transAxes,fontsize=14)

ymax=600
ax3.set_aspect(0.618/ymax)
ax3.hist(modelSf2tmp,bins=np.linspace(0,1.1,200),color=ReddishPurple)
ax3.hist(modelSs2tmp,bins=np.linspace(0,1.1,200),color=Blue)
ax3.set_xlim(0,1.0)
ax3.set_ylim(0,ymax)
ax3.set_xlabel(r'$S_{f,s}^2$',fontsize=14)
ax3.set_ylabel('Count',fontsize=14)
ax3.text(0.03,0.90,"(c)",transform=ax3.transAxes,fontsize=14)

ymax = 300
ax4.set_aspect(0.618*3/ymax)
ax4.hist(np.log10(modelTftmp[modelTftmp>0]),bins=np.linspace(-2.5,0.5,200),color=ReddishPurple)
ax4.hist(np.log10(modelTstmp[modelTstmp>0]),bins=np.linspace(-2.5,0.5,200),color=Blue)
ax4.axvline(np.log10(bestTf[n]),color=Orange)
ax4.set_xlim(-2.5,0.5)
ax4.set_ylim(0,ymax)
ax4.set_xlabel(r'$log_{10}(\tau_{f,s} /1 ns)$',fontsize=14)
ax4.text(0.03,0.90,"(d)",transform=ax4.transAxes,fontsize=14)

plt.savefig('BagDistRes26.pdf',bbox_inches = 'tight',pad_inches = 0)
plt.savefig('BagDistRes26.png',dpi=300,bbox_inches = 'tight',pad_inches = 0)

plt.show()

# %% [code]
# Make individual residue graphs for eventual figures

residue = 26

figureps = "GCN4_"+str(int(residue))+".ps"

print ("Residue",int(residue))

for i,vv in enumerate(res):
    if vv == residue:
        val = vv
        n = i

#create data vector
tmpdata=np.concatenate([np.array([j0[n,1]]),jwn[n,0:8:2],j87wH[n,0:8:2]])
tmperr=np.concatenate([np.array([j0[n,2]]),jwn[n,1:8:2],j87wH[n,1:8:2]])

normJ = tmpdata[1:]/tmpdata[0]
normJerr = normJ*np.sqrt((tmperr[1:]/tmpdata[1:])**2 + (tmperr[0]/tmpdata[0])**2)

tmpmodel1 = Jmf1(xr,*model1[n,:])
tmpmodel2 = Jmf2(xr,*model2[n,:])
tmpmodel3 = Jmf3(xr,*model3[n,:])
tmpmodel4 = Jmf4(xr,*model4[n,:])

bagtmp = np.delete(bagModel[n,:],1)
tmpmodelB = Jmf4(xr,*bagtmp)

print('\n\tModel1\t\tModel2\t\tModel3\t\tModel4\t\tModel5')
print('{0}\t{1:5.3f}\t\t{2:5.3f}\t\t{3:5.3f}\t\t{4:5.3f}\t\t{5:5.3f}'.
              format('AICc',AICcAll[n,0],AICcAll[n,1],AICcAll[n,2],AICcAll[n,3],AICcAll[n,4]))
print('{0}\t{1:5.3f}\t\t{2:5.3f}\t\t{3:5.3f}\t\t{4:5.3f}\t\t{5:5.3f}'.
              format('AIC%',AICWeights[n,0],AICWeights[n,1],AICWeights[n,2],AICWeights[n,3],AICWeights[n,4]))
print('{0}\t{1:5.3f}\t\t{2:5.3f}\t\t{3:5.3f}\t\t{4:5.3f}\t\t{5:5.3f}\n'.
              format('Bag%',bagWeights[n,0],bagWeights[n,1],bagWeights[n,2],bagWeights[n,3],bagWeights[n,4]))

print('\nModel\ttm\t\tS2\t\tSf2\t\tSs2\t\t\ttf\t\tts')

print('1   {0:5.3f} +/- {1:5.3f}  {2:5.3f} +/- {3:5.3f}'.
              format(model1[n,0],model1Jerr[n,0],model1[n,1],model1Jerr[n,1]))

if model2[n,2] < 0.2:
    print('2   {0:5.3f} +/- {1:5.3f}  {2:5.3f} +/- {3:5.3f}\t\t\t\t      {4:5.3f} +/- {5:5.3f}'.
          format(model2[n,0],model2Jerr[n,0],model2[n,1],model2Jerr[n,1],model2[n,2],model2Jerr[n,2]))
else:
    print('3   {0:5.3f} +/- {1:5.3f}  {2:5.3f} +/- {3:5.3f}\t\t\t\t\t\t       {4:5.3f} +/- {5:5.3f}'.
          format(model2[n,0],model2Jerr[n,0],model2[n,1],model2Jerr[n,1],model2[n,2],model2Jerr[n,2]))

print('4   {0:5.3f} +/- {1:5.3f}  {2:5.3f} +/- {3:5.3f}  {4:5.3f} +/- {5:5.3f}  {6:5.3f} +/- {7:5.3f}\t\t       {8:5.3f} +/- {9:5.3f}'.
      format(model3[n,0],model3Jerr[n,0],model3[n,1]*model3[n,2],model3Jerr[n,4],
             model3[n,1],model3Jerr[n,1],model3[n,2],model3Jerr[n,2],model3[n,3],model3Jerr[n,3]))
        
print('5   {0:5.3f} +/- {1:5.3f}  {2:5.3f} +/- {3:5.3f}  {4:5.3f} +/- {5:5.3f}  {6:5.3f} +/- {7:5.3f} {8:5.3f} +/- {9:5.3f} {10:5.3f} +/- {11:5.3f}'.
      format(model4[n,0],model4Jerr[n,0],model4[n,1]*model4[n,2],model4Jerr[n,5],
             model4[n,1],model4Jerr[n,1],model4[n,2],model4Jerr[n,2],model4[n,3],model4Jerr[n,3],model4[n,4],model4Jerr[n,4]))
print('Bag {0:5.3f} +/- {1:5.3f}  {2:5.3f} +/- {3:5.3f}  {4:5.3f} +/- {5:5.3f}  {6:5.3f} +/- {7:5.3f} {8:5.3f} +/- {9:5.3f} {10:5.3f} +/- {11:5.3f}'.
      format(bagModel[n,0],bagSmoothError[n,0],bagModel[n,1],bagSmoothError[n,1],
             bagModel[n,2],bagSmoothError[n,2],bagModel[n,3],bagSmoothError[n,3],bagModel[n,4],bagSmoothError[n,4],bagModel[n,5],bagSmoothError[n,5]))
        
fig=plt.figure(figsize=(12*2/2.54,15/2.54))

ncols=2
nrows=2

xmaxA = 5.0
xminA = 0.0
ymaxA = 1
yminA = -3

xmaxB = 7.0
xminB = 2.0
ymaxB = 0.25

xmaxC = 0.1
ymaxC = 0.03

#model 1
plt.subplot(nrows,ncols,1,aspect=0.618*(xmaxA-xminA)/(ymaxA-yminA))

plt.ylabel(r'$log_{10}[J(\omega)/(1 ns)]$',fontsize=14)
        
plt.xlim(xminA,xmaxA)
plt.ylim(yminA,ymaxA)
plt.text(4.5,0.5,'(a)',fontsize=14)

plt.errorbar(allfields,np.log10(tmpdata),yerr=tmperr/tmpdata, fmt='o',color='black')
plt.plot(xr,np.log10(tmpmodel1),color="black",lw=2)
plt.plot(xr,np.log10(tmpmodelB),color=ReddishPurple,lw=2)

#model 2/3
plt.subplot(nrows,ncols,2,aspect=0.618*(xmaxA-xminA)/(ymaxA-yminA))
        
plt.xlim(xminA,xmaxA)
plt.ylim(yminA,ymaxA)
plt.text(4.5,0.5,'(b)',fontsize=14)

plt.errorbar(allfields,np.log10(tmpdata),yerr=tmperr/tmpdata, fmt='o',color='black')
plt.plot(xr,np.log10(tmpmodel2),color="black",lw=2)
plt.plot(xr,np.log10(tmpmodelB),color=ReddishPurple,lw=2)

#model 4
plt.subplot(nrows,ncols,3,aspect=0.618*(xmaxA-xminA)/(ymaxA-yminA))

plt.xlabel(r'$\omega$ (1/ns)',fontsize=14)
plt.ylabel(r'$log_{10}[J(\omega)/(1 ns)]$',fontsize=14)
plt.text(4.5,0.5,'(c)',fontsize=14)

plt.xlim(xminA,xmaxA)
plt.ylim(yminA,ymaxA)

plt.errorbar(allfields,np.log10(tmpdata),yerr=tmperr/tmpdata, fmt='o',color='black')
plt.plot(xr,np.log10(tmpmodel3),color="black",lw=2)
plt.plot(xr,np.log10(tmpmodelB),color=ReddishPurple,lw=2)

#model 5
plt.subplot(nrows,ncols,4,aspect=0.618*(xmaxA-xminA)/(ymaxA-yminA))

plt.xlabel(r'$\omega$ (1/ns)',fontsize=14)
plt.text(4.5,0.5,'(d)',fontsize=14)

plt.xlim(xminA,xmaxA)
plt.ylim(yminA,ymaxA)

plt.errorbar(allfields,np.log10(tmpdata),yerr=tmperr/tmpdata, fmt='o',color='black')
plt.plot(xr,np.log10(tmpmodel4),color="black",lw=2)
plt.plot(xr,np.log10(tmpmodelB),color=ReddishPurple,lw=2)

plt.savefig('BagFitRes26.pdf',bbox_inches = 'tight',pad_inches = 0)
plt.savefig('BagFitRes26.png',dpi=300,bbox_inches = 'tight',pad_inches = 0)


plt.show()

# %% [code]
# Inspect some bootstrap parameters for model 1 and model 2 for typical residues

residue = 32
for i,vv in enumerate(res):
    if vv == residue:
        val = vv
        n = i
print('Residue',res[n])

modelTmtmp = np.array([])
modelS2tmp = np.array([])
modelSf2tmp = np.array([])
modelSs2tmp = np.array([])
modelTftmp = np.array([])
modelTstmp = np.array([])

m1AIC = AggAICc[n,0,:]
m2AIC = AggAICc[n,1,:]
m3AIC = AggAICc[n,2,:]
m4AIC = AggAICc[n,3,:]
AICtemp = np.stack((m1AIC,m2AIC,m3AIC,m4AIC))

for i in range(0,Nboot):
    best = np.int(np.argsort(AICtemp[:,i])[0])
        
    if best == 0:
        modelTmtmp = np.append(modelTmtmp,model1Agg[n,0,i])
        modelSf2tmp = np.append(modelSf2tmp,model1Agg[n,1,i])
        modelSs2tmp = np.append(modelSs2tmp,1.0)
        modelTftmp = np.append(modelTftmp,0)
        modelTstmp = np.append(modelTstmp,0) 
        
           
    elif best == 1:
        modelTmtmp = np.append(modelTmtmp,model2Agg[n,0,i])
        if model2Agg[n,2,i] < Tfcut:
            modelSf2tmp = np.append(modelSf2tmp,model2Agg[n,1,i])
            modelSs2tmp = np.append(modelSs2tmp,1.0)
            modelTftmp = np.append(modelTftmp,model2Agg[n,2,i])
            modelTstmp = np.append(modelTstmp,0)    
        else:
            modelSs2tmp = np.append(modelSs2tmp,model2Agg[n,1,i])
            modelSf2tmp = np.append(modelSf2tmp,1.0)
            modelTstmp = np.append(modelTstmp,model2Agg[n,2,i])
            modelTftmp = np.append(modelTftmp,0) 
        
    elif best == 2:
        modelTmtmp = np.append(modelTmtmp,model3Agg[n,0,i])
        modelSf2tmp = np.append(modelSf2tmp,model3Agg[n,1,i])
        modelSs2tmp = np.append(modelSs2tmp,model3Agg[n,2,i])
        modelTftmp = np.append(modelTftmp,0)
        modelTstmp = np.append(modelTstmp,model3Agg[n,3,i])
           
    elif best == 3:
        modelTmtmp = np.append(modelTmtmp,model4Agg[n,0,i])
        modelSf2tmp = np.append(modelSf2tmp,model4Agg[n,1,i])
        modelSs2tmp = np.append(modelSs2tmp,model4Agg[n,2,i])
        modelTftmp = np.append(modelTftmp,model4Agg[n,3,i])
        modelTstmp = np.append(modelTstmp,model4Agg[n,4,i])

modelS2tmp = modelSf2tmp*modelSs2tmp

print('\nCount Sf2=1:',np.sum(modelSf2tmp==1),'\t\tCount Sf2<1:',np.sum(modelSf2tmp != 1))
print('Count Ss2=1:',np.sum(modelSs2tmp==1),'\t\tCount Ss2=1:',np.sum(modelSs2tmp != 1))
print('Count tf=0:',np.sum(modelTftmp<=0),'\t\tCount tf>0:',np.sum(modelTftmp>0))
print('Count ts=0:',np.sum(modelTstmp<=0),'\t\tCount ts>0:',np.sum(modelTstmp>0))

fig, ((ax1, ax2), (ax3,ax4)) = plt.subplots(2, 2, sharex=False,figsize=(12*2/2.54,17/2.54))
#fig.subplots_adjust(hspace=0.1,wspace=0.3,top=0.95,bottom=0.15)

ymax=1000
ax1.set_aspect(0.618/ymax)
ax1.hist(modelS2tmp,bins=np.linspace(0,1.1,200),color='black')
ax1.set_xlim(0,1.0)
ax1.set_ylim(0,ymax)
ax1.set_xlabel(r'$S^2$',fontsize=14)
ax1.set_ylabel('Count',fontsize=14)
ax1.text(0.03,0.90,"(a)",transform=ax1.transAxes,fontsize=14)

ymax=1000
ax2.set_aspect(0.618*0.5/ymax)
ax2.hist(np.log10(modelTmtmp),bins=np.linspace(1,1.5,200),color='black')
ax2.set_xlim(1.0,1.5)
ax2.set_ylim(0,ymax)
ax2.set_xlabel(r'$log_{10}(\tau_m /1 ns)$',fontsize=14)
ax2.text(0.03,0.90,"(b)",transform=ax2.transAxes,fontsize=14)

ymax=1000
ax3.set_aspect(0.618/ymax)
ax3.hist(modelSf2tmp,bins=np.linspace(0,1.1,200),color=ReddishPurple)
ax3.hist(modelSs2tmp,bins=np.linspace(0,1.1,200),color=Blue)
ax3.set_xlim(0,1.0)
ax3.set_ylim(0,ymax)
ax3.set_xlabel(r'$S_{f,s}^2$',fontsize=14)
ax3.set_ylabel('Count',fontsize=14)
ax3.text(0.03,0.90,"(c)",transform=ax3.transAxes,fontsize=14)

ymax = 400
ax4.set_aspect(0.618*3/ymax)
ax4.hist(np.log10(modelTftmp[modelTftmp>0]),bins=np.linspace(-2.5,0.5,200),color=ReddishPurple)
ax4.hist(np.log10(modelTstmp[modelTstmp>0]),bins=np.linspace(-2.5,0.5,200),color=Blue)
ax4.axvline(np.log10(bestTf[n]),color=Orange)
ax4.set_xlim(-2.5,0.5)
ax4.set_ylim(0,ymax)
ax4.set_xlabel(r'$log_{10}(\tau_{f,s} /1 ns)$',fontsize=14)
ax4.text(0.03,0.90,"(d)",transform=ax4.transAxes,fontsize=14)

plt.savefig('BagDistRes32.pdf',bbox_inches = 'tight',pad_inches = 0)
plt.savefig('BagDistRes32.png',dpi=300,bbox_inches = 'tight',pad_inches = 0)

plt.show()

# %% [code]
# Make individual residue graphs for eventual figures

residue = 32

figureps = "GCN4_"+str(int(residue))+".ps"

print ("Residue",int(residue))

for i,vv in enumerate(res):
    if vv == residue:
        val = vv
        n = i

#create data vector
tmpdata=np.concatenate([np.array([j0[n,1]]),jwn[n,0:8:2],j87wH[n,0:8:2]])
tmperr=np.concatenate([np.array([j0[n,2]]),jwn[n,1:8:2],j87wH[n,1:8:2]])

normJ = tmpdata[1:]/tmpdata[0]
normJerr = normJ*np.sqrt((tmperr[1:]/tmpdata[1:])**2 + (tmperr[0]/tmpdata[0])**2)

tmpmodel1 = Jmf1(xr,*model1[n,:])
tmpmodel2 = Jmf2(xr,*model2[n,:])
tmpmodel3 = Jmf3(xr,*model3[n,:])
tmpmodel4 = Jmf4(xr,*model4[n,:])

bagtmp = np.delete(bagModel[n,:],1)
tmpmodelB = Jmf4(xr,*bagtmp)

print('\n\tModel1\t\tModel2\t\tModel3\t\tModel4\t\tModel5')
print('{0}\t{1:5.3f}\t\t{2:5.3f}\t\t{3:5.3f}\t\t{4:5.3f}\t\t{5:5.3f}'.
              format('AICc',AICcAll[n,0],AICcAll[n,1],AICcAll[n,2],AICcAll[n,3],AICcAll[n,4]))
print('{0}\t{1:5.3f}\t\t{2:5.3f}\t\t{3:5.3f}\t\t{4:5.3f}\t\t{5:5.3f}'.
              format('AIC%',AICWeights[n,0],AICWeights[n,1],AICWeights[n,2],AICWeights[n,3],AICWeights[n,4]))
print('{0}\t{1:5.3f}\t\t{2:5.3f}\t\t{3:5.3f}\t\t{4:5.3f}\t\t{5:5.3f}\n'.
              format('Bag%',bagWeights[n,0],bagWeights[n,1],bagWeights[n,2],bagWeights[n,3],bagWeights[n,4]))

print('\nModel\ttm\t\tS2\t\tSf2\t\tSs2\t\t\ttf\t\tts')

print('1   {0:5.3f} +/- {1:5.3f}  {2:5.3f} +/- {3:5.3f}'.
              format(model1[n,0],model1Jerr[n,0],model1[n,1],model1Jerr[n,1]))

if model2[n,2] < 0.2:
    print('2   {0:5.3f} +/- {1:5.3f}  {2:5.3f} +/- {3:5.3f}\t\t\t\t      {4:5.3f} +/- {5:5.3f}'.
          format(model2[n,0],model2Jerr[n,0],model2[n,1],model2Jerr[n,1],model2[n,2],model2Jerr[n,2]))
else:
    print('3   {0:5.3f} +/- {1:5.3f}  {2:5.3f} +/- {3:5.3f}\t\t\t\t\t\t       {4:5.3f} +/- {5:5.3f}'.
          format(model2[n,0],model2Jerr[n,0],model2[n,1],model2Jerr[n,1],model2[n,2],model2Jerr[n,2]))

print('4   {0:5.3f} +/- {1:5.3f}  {2:5.3f} +/- {3:5.3f}  {4:5.3f} +/- {5:5.3f}  {6:5.3f} +/- {7:5.3f}\t\t       {8:5.3f} +/- {9:5.3f}'.
      format(model3[n,0],model3Jerr[n,0],model3[n,1]*model3[n,2],model3Jerr[n,4],
             model3[n,1],model3Jerr[n,1],model3[n,2],model3Jerr[n,2],model3[n,3],model3Jerr[n,3]))
        
print('5   {0:5.3f} +/- {1:5.3f}  {2:5.3f} +/- {3:5.3f}  {4:5.3f} +/- {5:5.3f}  {6:5.3f} +/- {7:5.3f} {8:5.3f} +/- {9:5.3f} {10:5.3f} +/- {11:5.3f}'.
      format(model4[n,0],model4Jerr[n,0],model4[n,1]*model4[n,2],model4Jerr[n,5],
             model4[n,1],model4Jerr[n,1],model4[n,2],model4Jerr[n,2],model4[n,3],model4Jerr[n,3],model4[n,4],model4Jerr[n,4]))
print('Bag {0:5.3f} +/- {1:5.3f}  {2:5.3f} +/- {3:5.3f}  {4:5.3f} +/- {5:5.3f}  {6:5.3f} +/- {7:5.3f} {8:5.3f} +/- {9:5.3f} {10:5.3f} +/- {11:5.3f}'.
      format(bagModel[n,0],bagSmoothError[n,0],bagModel[n,1],bagSmoothError[n,1],
             bagModel[n,2],bagSmoothError[n,2],bagModel[n,3],bagSmoothError[n,3],bagModel[n,4],bagSmoothError[n,4],bagModel[n,5],bagSmoothError[n,5]))
        
fig=plt.figure(figsize=(12*2/2.54,15/2.54))

ncols=2
nrows=2

xmaxA = 5.0
xminA = 0.0
ymaxA = 1
yminA = -3

xmaxB = 7.0
xminB = 2.0
ymaxB = 0.25

xmaxC = 0.1
ymaxC = 0.03

#model 1
plt.subplot(nrows,ncols,1,aspect=0.618*(xmaxA-xminA)/(ymaxA-yminA))

plt.ylabel(r'$log_{10}[J(\omega)/(1 ns)]$',fontsize=14)
        
plt.xlim(xminA,xmaxA)
plt.ylim(yminA,ymaxA)
plt.text(4.5,0.5,'(a)',fontsize=14)

plt.errorbar(allfields,np.log10(tmpdata),yerr=tmperr/tmpdata, fmt='o',color='black')
plt.plot(xr,np.log10(tmpmodel1),color="black",lw=2)
plt.plot(xr,np.log10(tmpmodelB),color=ReddishPurple,lw=2)

#model 2/3
plt.subplot(nrows,ncols,2,aspect=0.618*(xmaxA-xminA)/(ymaxA-yminA))
        
plt.xlim(xminA,xmaxA)
plt.ylim(yminA,ymaxA)
plt.text(4.5,0.5,'(b)',fontsize=14)

plt.errorbar(allfields,np.log10(tmpdata),yerr=tmperr/tmpdata, fmt='o',color='black')
plt.plot(xr,np.log10(tmpmodel2),color="black",lw=2)
plt.plot(xr,np.log10(tmpmodelB),color=ReddishPurple,lw=2)

#model 4
plt.subplot(nrows,ncols,3,aspect=0.618*(xmaxA-xminA)/(ymaxA-yminA))

plt.xlabel(r'$\omega$ (1/ns)',fontsize=14)
plt.ylabel(r'$log_{10}[J(\omega)/(1 ns)]$',fontsize=14)
plt.text(4.5,0.5,'(c)',fontsize=14)

plt.xlim(xminA,xmaxA)
plt.ylim(yminA,ymaxA)

plt.errorbar(allfields,np.log10(tmpdata),yerr=tmperr/tmpdata, fmt='o',color='black')
plt.plot(xr,np.log10(tmpmodel3),color="black",lw=2)
plt.plot(xr,np.log10(tmpmodelB),color=ReddishPurple,lw=2)

#model 5
plt.subplot(nrows,ncols,4,aspect=0.618*(xmaxA-xminA)/(ymaxA-yminA))

plt.xlabel(r'$\omega$ (1/ns)',fontsize=14)
plt.text(4.5,0.5,'(d)',fontsize=14)

plt.xlim(xminA,xmaxA)
plt.ylim(yminA,ymaxA)

plt.errorbar(allfields,np.log10(tmpdata),yerr=tmperr/tmpdata, fmt='o',color='black')
plt.plot(xr,np.log10(tmpmodel4),color="black",lw=2)
plt.plot(xr,np.log10(tmpmodelB),color=ReddishPurple,lw=2)

plt.savefig('BagFitRes32.pdf',bbox_inches = 'tight',pad_inches = 0)
plt.savefig('BagFitRes32.png',dpi=300,bbox_inches = 'tight',pad_inches = 0)

plt.show()

# %% [code]
